# Supplementary material
Source: publisher figshare collection journal article supplement (https://gsapubs.figshare.com/ndownloader/files/22410513)
Supplement: Supplementary file 1 [file 22410513]

## Sheet: ISS and ISKK O isotopes
REFERENCE1	LOCATION	SAMPLE NAME	MATERIAL	SPOT NAME	ANALYSIS DATE	STANDARDS6	Oxygen isotopic data are reported in δ18O notation relative to Vienna Standard Mean Ocean Water (VSMOW)
							16O Measured	16O Error	18O Measured	18O Error	18O/16O Measured	18O/16O Error	18O/16O Corrected	δ18O Corrected	Error (1σ)	Total Error (2σ)	internal error (1σ)	External error (1σ)
Carley et al. 2014.	Krossá-Kækjudalsá	ISKK	Zircon	TLC2_ISKK@1.ais	Jan 2013.	R33 (δ18O = 5.55 ± 0.08 ‰, 2SD), Valley (2003)	2831161000	2695376	5689166	5545.73	0.00200948	9.00473e-08	0.00200888	3.1846	0.406687	0.813373	0.0448112	0.361875
Carley et al. 2014.	Krossá-Kækjudalsá	ISKK	Zircon	TLC2_ISKK@10.ais	Jan 2013.	R33 (δ18O = 5.55 ± 0.08 ‰, 2SD), Valley (2003)	2972698000	2682801	5974342	5386.55	0.00200974	1.12902e-07	0.00200899	3.24056	0.418053	0.836106	0.0561776	0.361875
Carley et al. 2014.	Krossá-Kækjudalsá	ISKK	Zircon	TLC2_ISKK@11.ais	Jan 2013.	R33 (δ18O = 5.55 ± 0.08 ‰, 2SD), Valley (2003)	2943463000	1548394	5915352	3078.76	0.00200966	1.78604e-07	0.00200891	3.20112	0.450748	0.901496	0.0888728	0.361875
Carley et al. 2014.	Krossá-Kækjudalsá	ISKK	Zircon	TLC2_ISKK@12.ais	Jan 2013.	R33 (δ18O = 5.55 ± 0.08 ‰, 2SD), Valley (2003)	2964541000	1009379	5957940	2265.35	0.00200973	1.05671e-07	0.00200899	3.23906	0.414455	0.828909	0.0525794	0.361875
Carley et al. 2014.	Krossá-Kækjudalsá	ISKK	Zircon	TLC2_ISKK@13.ais	Jan 2013.	R33 (δ18O = 5.55 ± 0.08 ‰, 2SD), Valley (2003)	2927002000	917985	5881485	1800.2	0.00200939	1.22514e-07	0.00200864	3.06684	0.422846	0.845692	0.0609706	0.361875
Carley et al. 2014.	Krossá-Kækjudalsá	ISKK	Zircon	TLC2_ISKK@14.ais	Jan 2013.	R33 (δ18O = 5.55 ± 0.08 ‰, 2SD), Valley (2003)	2912942000	4322480	5853399	8975.58	0.00200944	1.27951e-07	0.0020087	3.09429	0.42555	0.8511	0.0636746	0.361875
Carley et al. 2014.	Krossá-Kækjudalsá	ISKK	Zircon	TLC2_ISKK@15.ais	Jan 2013.	R33 (δ18O = 5.55 ± 0.08 ‰, 2SD), Valley (2003)	2924277000	4354164	5877552	8820.68	0.00200992	1.20685e-07	0.00200832	2.90485	0.42192	0.84384	0.0600446	0.361875
Carley et al. 2014.	Krossá-Kækjudalsá	ISKK	Zircon	TLC2_ISKK@16.ais	Jan 2013.	R33 (δ18O = 5.55 ± 0.08 ‰, 2SD), Valley (2003)	2985589000	3247397	5991043	6486.39	0.00200665	1.19312e-07	0.00200506	1.27718	0.421333	0.842667	0.059458	0.361875
Carley et al. 2014.	Krossá-Kækjudalsá	ISKK	Zircon	TLC2_ISKK@17.ais	Jan 2013.	R33 (δ18O = 5.55 ± 0.08 ‰, 2SD), Valley (2003)	2747308000	5960656	5520473	11978.6	0.00200941	9.0751e-08	0.00200781	2.65336	0.407038	0.814077	0.045163	0.361875
Carley et al. 2014.	Krossá-Kækjudalsá	ISKK	Zircon	TLC2_ISKK@18.ais	Jan 2013.	R33 (δ18O = 5.55 ± 0.08 ‰, 2SD), Valley (2003)	2891902000	4128110	5811254	8367.91	0.00200949	1.55328e-07	0.00200789	2.69328	0.439172	0.878345	0.0772972	0.361875
Carley et al. 2014.	Krossá-Kækjudalsá	ISKK	Zircon	TLC2_ISKK@19.ais	Jan 2013.	R33 (δ18O = 5.55 ± 0.08 ‰, 2SD), Valley (2003)	2982323000	921729	5992653	2062.57	0.00200939	1.47291e-07	0.00200779	2.64288	0.435177	0.870353	0.0733013	0.361875
Carley et al. 2014.	Krossá-Kækjudalsá	ISKK	Zircon	TLC2_ISKK@2.ais	Jan 2013.	R33 (δ18O = 5.55 ± 0.08 ‰, 2SD), Valley (2003)	2880599000	3238682	5788979	6581.59	0.00200964	1.03651e-07	0.00200904	3.26598	0.413452	0.826904	0.0515768	0.361875
Carley et al. 2014.	Krossá-Kækjudalsá	ISKK	Zircon	TLC2_ISKK@20.ais	Jan 2013.	R33 (δ18O = 5.55 ± 0.08 ‰, 2SD), Valley (2003)	2949084000	889988	5926984	1815.56	0.00200977	1.20652e-07	0.00200789	2.69368	0.421908	0.843816	0.0600329	0.361875
Carley et al. 2014.	Krossá-Kækjudalsá	ISKK	Zircon	TLC2_ISKK@21.ais	Jan 2013.	R33 (δ18O = 5.55 ± 0.08 ‰, 2SD), Valley (2003)	2944345000	668523	5917148	1424.26	0.00200966	1.47177e-07	0.00200779	2.64029	0.43511	0.87022	0.0732345	0.361875
Carley et al. 2014.	Krossá-Kækjudalsá	ISKK	Zircon	TLC2_ISKK@22.ais	Jan 2013.	R33 (δ18O = 5.55 ± 0.08 ‰, 2SD), Valley (2003)	2934445000	888732	5897175	1656.38	0.00200964	1.2414e-07	0.00200776	2.62732	0.423647	0.847295	0.061772	0.361875
Carley et al. 2014.	Krossá-Kækjudalsá	ISKK	Zircon	TLC2_ISKK@23.ais	Jan 2013.	R33 (δ18O = 5.55 ± 0.08 ‰, 2SD), Valley (2003)	2905764000	2804549	5839836	5742.68	0.00200974	8.85696e-08	0.00200786	2.67821	0.405945	0.811891	0.0440702	0.361875
Carley et al. 2014.	Krossá-Kækjudalsá	ISKK	Zircon	TLC2_ISKK@24.ais	Jan 2013.	R33 (δ18O = 5.55 ± 0.08 ‰, 2SD), Valley (2003)	2971592000	4104838	5972040	8520.21	0.00200971	1.78606e-07	0.00200783	2.66224	0.450747	0.901494	0.0888717	0.361875
Carley et al. 2014.	Krossá-Kækjudalsá	ISKK	Zircon	TLC2_ISKK@25.ais	Jan 2013.	R33 (δ18O = 5.55 ± 0.08 ‰, 2SD), Valley (2003)	3003453000	1970770	6035262	3917.92	0.00200944	8.5826e-08	0.0020083	2.89473	0.404587	0.809173	0.0427114	0.361875
Carley et al. 2014.	Krossá-Kækjudalsá	ISKK	Zircon	TLC2_ISKK@26.ais	Jan 2013.	R33 (δ18O = 5.55 ± 0.08 ‰, 2SD), Valley (2003)	2906837000	10084140	5841518	20274.5	0.00200958	1.4639e-07	0.00200843	2.9636	0.434721	0.869443	0.0728462	0.361875
Carley et al. 2014.	Krossá-Kækjudalsá	ISKK	Zircon	TLC2_ISKK@3.ais	Jan 2013.	R33 (δ18O = 5.55 ± 0.08 ‰, 2SD), Valley (2003)	2870527000	2354144	5768810	4613.9	0.00200967	1.63751e-07	0.00200907	3.27896	0.443357	0.886714	0.0814817	0.361875
Carley et al. 2014.	Krossá-Kækjudalsá	ISKK	Zircon	TLC2_ISKK@4.ais	Jan 2013.	R33 (δ18O = 5.55 ± 0.08 ‰, 2SD), Valley (2003)	2645863000	1208940	5321961	2388.76	0.00201143	1.33246e-07	0.00201082	4.1566	0.42812	0.856239	0.0662444	0.361875
Carley et al. 2014.	Krossá-Kækjudalsá	ISKK	Zircon	TLC2_ISKK@5.ais	Jan 2013.	R33 (δ18O = 5.55 ± 0.08 ‰, 2SD), Valley (2003)	2866887000	6712355	5760532	13679.4	0.00200933	1.19948e-07	0.00200847	2.97988	0.421571	0.843142	0.0596956	0.361875
Carley et al. 2014.	Krossá-Kækjudalsá	ISKK	Zircon	TLC2_ISKK@6.ais	Jan 2013.	R33 (δ18O = 5.55 ± 0.08 ‰, 2SD), Valley (2003)	2906507000	940473	5841302	2064.33	0.00200973	1.37311e-07	0.00200887	3.18004	0.430198	0.860397	0.068323	0.361875
Carley et al. 2014.	Krossá-Kækjudalsá	ISKK	Zircon	TLC2_ISKK@7.ais	Jan 2013.	R33 (δ18O = 5.55 ± 0.08 ‰, 2SD), Valley (2003)	2927811000	5178312	5884076	10537.7	0.00200972	9.33013e-08	0.00200885	3.17256	0.4083	0.816601	0.0464251	0.361875
Carley et al. 2014.	Krossá-Kækjudalsá	ISKK	Zircon	TLC2_ISKK@8.ais	Jan 2013.	R33 (δ18O = 5.55 ± 0.08 ‰, 2SD), Valley (2003)	1150082000	7319219	2306957	14605.8	0.00200591	4.02305e-07	0.00200505	1.27275	0.562435	1.12487	0.200559	0.361875
Carley et al. 2014.	Krossá-Kækjudalsá	ISKK	Zircon	TLC2_ISKK@9.ais	Jan 2013.	R33 (δ18O = 5.55 ± 0.08 ‰, 2SD), Valley (2003)	2739832000	2843769	5502090	5881.69	0.00200818	1.50037e-07	0.00200732	2.40684	0.436588	0.873176	0.0747128	0.361875
Carley et al. 2014.	Krossá-Kækjudalsá	ISKK	Zircon	TLC4_ISKK@1.ais	Jan 2013.	R33 (δ18O = 5.55 ± 0.08 ‰, 2SD), Valley (2003)	2434602000	1782776	4892173	3535.4	0.00200943	1.64115e-07	0.00200925	3.36984	0.193333	0.386666	0.0816723	0.111661
Carley et al. 2014.	Krossá-Kækjudalsá	ISKK	Zircon	TLC4_ISKK@10.ais	Jan 2013.	R33 (δ18O = 5.55 ± 0.08 ‰, 2SD), Valley (2003)	2490593000	1012488	5006944	2223.39	0.00201034	1.62801e-07	0.00200986	3.6761	0.192643	0.385285	0.0809817	0.111661
Carley et al. 2014.	Krossá-Kækjudalsá	ISKK	Zircon	TLC4_ISKK@11.ais	Jan 2013.	R33 (δ18O = 5.55 ± 0.08 ‰, 2SD), Valley (2003)	2455160000	2329414	4935743	4727.15	0.00201035	1.60524e-07	0.00200979	3.6421	0.191509	0.383019	0.0798485	0.111661
Carley et al. 2014.	Krossá-Kækjudalsá	ISKK	Zircon	TLC4_ISKK@12.ais	Jan 2013.	R33 (δ18O = 5.55 ± 0.08 ‰, 2SD), Valley (2003)	2504422000	2105629	5032480	4287.91	0.00200944	1.61908e-07	0.00200885	3.17134	0.192234	0.384469	0.0805735	0.111661
Carley et al. 2014.	Krossá-Kækjudalsá	ISKK	Zircon	TLC4_ISKK@13.ais	Jan 2013.	R33 (δ18O = 5.55 ± 0.08 ‰, 2SD), Valley (2003)	2515189000	1283542	5056861	2676.6	0.00201053	1.43371e-07	0.00200991	3.70282	0.182971	0.365942	0.0713101	0.111661
Carley et al. 2014.	Krossá-Kækjudalsá	ISKK	Zircon	TLC4_ISKK@14.ais	Jan 2013.	R33 (δ18O = 5.55 ± 0.08 ‰, 2SD), Valley (2003)	2532126000	879456	5090893	1795.7	0.00201052	1.32523e-07	0.00200988	3.68549	0.177576	0.355151	0.0659147	0.111661
Carley et al. 2014.	Krossá-Kækjudalsá	ISKK	Zircon	TLC4_ISKK@15.ais	Jan 2013.	R33 (δ18O = 5.55 ± 0.08 ‰, 2SD), Valley (2003)	2526979000	688634	5081479	1370.11	0.00201089	1.47531e-07	0.00201022	3.85693	0.185027	0.370053	0.0733658	0.111661
Carley et al. 2014.	Krossá-Kækjudalsá	ISKK	Zircon	TLC4_ISKK@16.ais	Jan 2013.	R33 (δ18O = 5.55 ± 0.08 ‰, 2SD), Valley (2003)	2542626000	436877	5113291	1047.81	0.00201103	9.08366e-08	0.00201028	3.88534	0.15683	0.31366	0.0451692	0.111661
Carley et al. 2014.	Krossá-Kækjudalsá	ISKK	Zircon	TLC4_ISKK@17.ais	Jan 2013.	R33 (δ18O = 5.55 ± 0.08 ‰, 2SD), Valley (2003)	2558195000	823813	5142853	1473.21	0.00201035	1.46229e-07	0.00200957	3.53094	0.184399	0.368798	0.0727381	0.111661
Carley et al. 2014.	Krossá-Kækjudalsá	ISKK	Zircon	TLC4_ISKK@18.ais	Jan 2013.	R33 (δ18O = 5.55 ± 0.08 ‰, 2SD), Valley (2003)	2561671000	998180	5150946	2155.73	0.00201077	1.19777e-07	0.00200997	3.73233	0.171229	0.342457	0.0595676	0.111661
Carley et al. 2014.	Krossá-Kækjudalsá	ISKK	Zircon	TLC4_ISKK@19.ais	Jan 2013.	R33 (δ18O = 5.55 ± 0.08 ‰, 2SD), Valley (2003)	2576278000	383818	5180240	1010.48	0.00201075	1.66217e-07	0.00200992	3.70452	0.194325	0.388651	0.0826644	0.111661
Carley et al. 2014.	Krossá-Kækjudalsá	ISKK	Zircon	TLC4_ISKK@2.ais	Jan 2013.	R33 (δ18O = 5.55 ± 0.08 ‰, 2SD), Valley (2003)	2452638000	2256700	4929900	4477	0.00201004	1.768e-07	0.00200983	3.65863	0.199619	0.399239	0.0879583	0.111661
Carley et al. 2014.	Krossá-Kækjudalsá	ISKK	Zircon	TLC4_ISKK@20.ais	Jan 2013.	R33 (δ18O = 5.55 ± 0.08 ‰, 2SD), Valley (2003)	2557399000	802727	5143855	1743.78	0.00201136	1.80854e-07	0.00201051	3.9988	0.201577	0.403155	0.0899164	0.111661
Carley et al. 2014.	Krossá-Kækjudalsá	ISKK	Zircon	TLC4_ISKK@21.ais	Jan 2013.	R33 (δ18O = 5.55 ± 0.08 ‰, 2SD), Valley (2003)	2575991000	976178	5179713	1860.2	0.00201076	1.19602e-07	0.00200983	3.66067	0.171142	0.342283	0.0594807	0.111661
Carley et al. 2014.	Krossá-Kækjudalsá	ISKK	Zircon	TLC4_ISKK@22.ais	Jan 2013.	R33 (δ18O = 5.55 ± 0.08 ‰, 2SD), Valley (2003)	2572871000	792796	5174800	1675.03	0.00201129	1.58489e-07	0.00201033	3.91151	0.19046	0.380921	0.0787994	0.111661
Carley et al. 2014.	Krossá-Kækjudalsá	ISKK	Zircon	TLC4_ISKK@23.ais	Jan 2013.	R33 (δ18O = 5.55 ± 0.08 ‰, 2SD), Valley (2003)	2553588000	490870	5135256	846.27	0.002011	1.5087e-07	0.00201001	3.74986	0.186683	0.373366	0.0750222	0.111661
Carley et al. 2014.	Krossá-Kækjudalsá	ISKK	Zircon	TLC4_ISKK@24.ais	Jan 2013.	R33 (δ18O = 5.55 ± 0.08 ‰, 2SD), Valley (2003)	2537896000	699871	5104259	1641.19	0.00201122	1.86468e-07	0.0020102	3.84639	0.204375	0.40875	0.0927141	0.111661
Carley et al. 2014.	Krossá-Kækjudalsá	ISKK	Zircon	TLC4_ISKK@25.ais	Jan 2013.	R33 (δ18O = 5.55 ± 0.08 ‰, 2SD), Valley (2003)	2534011000	992658	5092812	1809.13	0.00200978	1.66464e-07	0.00200874	3.11695	0.194488	0.388976	0.0828269	0.111661
Carley et al. 2014.	Krossá-Kækjudalsá	ISKK	Zircon	TLC4_ISKK@26.ais	Jan 2013.	R33 (δ18O = 5.55 ± 0.08 ‰, 2SD), Valley (2003)	2521059000	1745675	5069371	3511.1	0.00201081	1.01162e-07	0.00200969	3.58981	0.16197	0.32394	0.0503091	0.111661
Carley et al. 2014.	Krossá-Kækjudalsá	ISKK	Zircon	TLC4_ISKK@27.ais	Jan 2013.	R33 (δ18O = 5.55 ± 0.08 ‰, 2SD), Valley (2003)	2554025000	619743	5135690	1313.09	0.00201082	1.3601e-07	0.00200967	3.58247	0.1793	0.3586	0.0676389	0.111661
Carley et al. 2014.	Krossá-Kækjudalsá	ISKK	Zircon	TLC4_ISKK@28.ais	Jan 2013.	R33 (δ18O = 5.55 ± 0.08 ‰, 2SD), Valley (2003)	2587921000	1302977	5203578	2763.83	0.00201072	1.75092e-07	0.00200954	3.5167	0.19874	0.397481	0.0870794	0.111661
Carley et al. 2014.	Krossá-Kækjudalsá	ISKK	Zircon	TLC4_ISKK@29.ais	Jan 2013.	R33 (δ18O = 5.55 ± 0.08 ‰, 2SD), Valley (2003)	2574146000	1304896	5176431	2606.18	0.00201093	1.28152e-07	0.00200973	3.61074	0.175388	0.350777	0.0637275	0.111661
Carley et al. 2014.	Krossá-Kækjudalsá	ISKK	Zircon	TLC4_ISKK@3.ais	Jan 2013.	R33 (δ18O = 5.55 ± 0.08 ‰, 2SD), Valley (2003)	2449922000	1200513	4922448	2389.28	0.00200923	1.24223e-07	0.00200899	3.2388	0.173487	0.346975	0.0618264	0.111661
Carley et al. 2014.	Krossá-Kækjudalsá	ISKK	Zircon	TLC4_ISKK@30.ais	Jan 2013.	R33 (δ18O = 5.55 ± 0.08 ‰, 2SD), Valley (2003)	2582479000	1306426	5193731	2607.39	0.00201114	1.73552e-07	0.00200991	3.70227	0.197956	0.395912	0.0862952	0.111661
Carley et al. 2014.	Krossá-Kækjudalsá	ISKK	Zircon	TLC4_ISKK@31.ais	Jan 2013.	R33 (δ18O = 5.55 ± 0.08 ‰, 2SD), Valley (2003)	2612602000	416361	5253268	878.236	0.00201074	6.20036e-08	0.00200943	3.46202	0.142497	0.284994	0.0308362	0.111661
Carley et al. 2014.	Krossá-Kækjudalsá	ISKK	Zircon	TLC4_ISKK@32.ais	Jan 2013.	R33 (δ18O = 5.55 ± 0.08 ‰, 2SD), Valley (2003)	2582391000	1101556	5193359	2238.68	0.00201107	1.21826e-07	0.00200973	3.61099	0.172239	0.344477	0.0605777	0.111661
Carley et al. 2014.	Krossá-Kækjudalsá	ISKK	Zircon	TLC4_ISKK@33.ais	Jan 2013.	R33 (δ18O = 5.55 ± 0.08 ‰, 2SD), Valley (2003)	2618304000	1069572	5264674	2191.72	0.00201072	1.29481e-07	0.00200936	3.42437	0.176056	0.352113	0.0643955	0.111661
Carley et al. 2014.	Krossá-Kækjudalsá	ISKK	Zircon	TLC4_ISKK@34.ais	Jan 2013.	R33 (δ18O = 5.55 ± 0.08 ‰, 2SD), Valley (2003)	2623705000	622918	5277008	1277.13	0.00201128	1.16585e-07	0.00200989	3.69169	0.169626	0.339253	0.0579655	0.111661
Carley et al. 2014.	Krossá-Kækjudalsá	ISKK	Zircon	TLC4_ISKK@35.ais	Jan 2013.	R33 (δ18O = 5.55 ± 0.08 ‰, 2SD), Valley (2003)	2602007000	1689658	5232005	3487.29	0.00201076	1.48958e-07	0.00200934	3.41668	0.185741	0.371483	0.0740804	0.111661
Carley et al. 2014.	Krossá-Kækjudalsá	ISKK	Zircon	TLC4_ISKK@36.ais	Jan 2013.	R33 (δ18O = 5.55 ± 0.08 ‰, 2SD), Valley (2003)	2630651000	1325970	5290881	2660.11	0.00201124	1.32961e-07	0.00200975	3.61988	0.17777	0.355539	0.0661088	0.111661
Carley et al. 2014.	Krossá-Kækjudalsá	ISKK	Zircon	TLC4_ISKK@37.ais	Jan 2013.	R33 (δ18O = 5.55 ± 0.08 ‰, 2SD), Valley (2003)	2620237000	1278724	5269659	2744.89	0.00201114	1.83271e-07	0.00200962	3.55361	0.202789	0.405578	0.091128	0.111661
Carley et al. 2014.	Krossá-Kækjudalsá	ISKK	Zircon	TLC4_ISKK@38.ais	Jan 2013.	R33 (δ18O = 5.55 ± 0.08 ‰, 2SD), Valley (2003)	2642233000	350574	5313651	922.113	0.00201105	1.60625e-07	0.0020095	3.49433	0.191532	0.383064	0.0798712	0.111661
Carley et al. 2014.	Krossá-Kækjudalsá	ISKK	Zircon	TLC4_ISKK@39.ais	Jan 2013.	R33 (δ18O = 5.55 ± 0.08 ‰, 2SD), Valley (2003)	2621650000	550756	5272302	1202.37	0.00201106	1.46906e-07	0.00200949	3.48949	0.18471	0.369419	0.0730488	0.111661
Carley et al. 2014.	Krossá-Kækjudalsá	ISKK	Zircon	TLC4_ISKK@4.ais	Jan 2013.	R33 (δ18O = 5.55 ± 0.08 ‰, 2SD), Valley (2003)	2434335000	341088	4892359	685.149	0.00200973	1.47484e-07	0.00200946	3.47765	0.185046	0.370092	0.0733851	0.111661
Carley et al. 2014.	Krossá-Kækjudalsá	ISKK	Zircon	TLC4_ISKK@5.ais	Jan 2013.	R33 (δ18O = 5.55 ± 0.08 ‰, 2SD), Valley (2003)	2439301000	942493	4902898	2028.04	0.00200996	1.40664e-07	0.00200967	3.57868	0.181644	0.363289	0.0699836	0.111661
Carley et al. 2014.	Krossá-Kækjudalsá	ISKK	Zircon	TLC4_ISKK@6.ais	Jan 2013.	R33 (δ18O = 5.55 ± 0.08 ‰, 2SD), Valley (2003)	2527214000	1213777	5080199	2381.89	0.0020102	8.19278e-08	0.00200982	3.65703	0.152417	0.304834	0.0407561	0.111661
Carley et al. 2014.	Krossá-Kækjudalsá	ISKK	Zircon	TLC4_ISKK@7.ais	Jan 2013.	R33 (δ18O = 5.55 ± 0.08 ‰, 2SD), Valley (2003)	2548310000	744254	5122189	1434.9	0.00201003	1.05614e-07	0.00200963	3.5623	0.164205	0.328409	0.0525436	0.111661
Carley et al. 2014.	Krossá-Kækjudalsá	ISKK	Zircon	TLC4_ISKK@8.ais	Jan 2013.	R33 (δ18O = 5.55 ± 0.08 ‰, 2SD), Valley (2003)	2546499000	449732	5118473	943.202	0.00201	1.24974e-07	0.00200958	3.53398	0.173837	0.347674	0.0621762	0.111661
Carley et al. 2014.	Krossá-Kækjudalsá	ISKK	Zircon	TLC4_ISKK@9.ais	Jan 2013.	R33 (δ18O = 5.55 ± 0.08 ‰, 2SD), Valley (2003)	2516097000	303064	5058182	714.212	0.00201033	1.16553e-07	0.00200988	3.68295	0.169638	0.339276	0.0579773	0.111661
Carley et al. 2014.	Krossá-Kækjudalsá	ISKK	Zircon	TLC6_ISKK@1.ais	Jan 2013.	R33 (δ18O = 5.55 ± 0.08 ‰, 2SD), Valley (2003)	2874519000	921176	5771690	1995.43	0.00200788	1.04135e-07	0.00200794	2.7144	0.31386	0.627719	0.0518633	0.261996
Carley et al. 2014.	Krossá-Kækjudalsá	ISKK	Zircon	TLC6_ISKK@10.ais	Jan 2013.	R33 (δ18O = 5.55 ± 0.08 ‰, 2SD), Valley (2003)	2868387000	1860009	5764217	3759.26	0.00200957	1.16987e-07	0.00200932	3.40675	0.320211	0.640422	0.0582149	0.261996
Carley et al. 2014.	Krossá-Kækjudalsá	ISKK	Zircon	TLC6_ISKK@11.ais	Jan 2013.	R33 (δ18O = 5.55 ± 0.08 ‰, 2SD), Valley (2003)	2877349000	1187077	5780526	2250.9	0.00200898	1.34463e-07	0.00200853	3.01105	0.328928	0.657855	0.0669314	0.261996
Carley et al. 2014.	Krossá-Kækjudalsá	ISKK	Zircon	TLC6_ISKK@12.ais	Jan 2013.	R33 (δ18O = 5.55 ± 0.08 ‰, 2SD), Valley (2003)	2877837000	938373	5783416	2003.23	0.00200964	9.54364e-08	0.00200919	3.34256	0.309486	0.618971	0.0474893	0.261996
Carley et al. 2014.	Krossá-Kækjudalsá	ISKK	Zircon	TLC6_ISKK@13.ais	Jan 2013.	R33 (δ18O = 5.55 ± 0.08 ‰, 2SD), Valley (2003)	2871701000	1334837	5769254	2948.37	0.002009	1.89533e-07	0.00200856	3.02403	0.356338	0.712676	0.0943419	0.261996
Carley et al. 2014.	Krossá-Kækjudalsá	ISKK	Zircon	TLC6_ISKK@14.ais	Jan 2013.	R33 (δ18O = 5.55 ± 0.08 ‰, 2SD), Valley (2003)	2884558000	1040603	5795668	2249.11	0.00200921	1.16401e-07	0.00200876	3.12538	0.31993	0.639861	0.057934	0.261996
Carley et al. 2014.	Krossá-Kækjudalsá	ISKK	Zircon	TLC6_ISKK@15.ais	Jan 2013.	R33 (δ18O = 5.55 ± 0.08 ‰, 2SD), Valley (2003)	2868120000	812796	5765311	1700.98	0.00201014	9.41108e-08	0.00200969	3.5902	0.308814	0.617629	0.0468181	0.261996
Carley et al. 2014.	Krossá-Kækjudalsá	ISKK	Zircon	TLC6_ISKK@16.ais	Jan 2013.	R33 (δ18O = 5.55 ± 0.08 ‰, 2SD), Valley (2003)	2882339000	1370182	5791539	2495.78	0.00200932	1.54456e-07	0.00200874	3.1183	0.338866	0.677733	0.07687	0.261996
Carley et al. 2014.	Krossá-Kækjudalsá	ISKK	Zircon	TLC6_ISKK@17.ais	Jan 2013.	R33 (δ18O = 5.55 ± 0.08 ‰, 2SD), Valley (2003)	2923648000	2013032	5874064	4008.26	0.00200916	1.17532e-07	0.00200858	3.03692	0.320495	0.640989	0.0584982	0.261996
Carley et al. 2014.	Krossá-Kækjudalsá	ISKK	Zircon	TLC6_ISKK@18.ais	Jan 2013.	R33 (δ18O = 5.55 ± 0.08 ‰, 2SD), Valley (2003)	2929463000	2021545	5885015	4111.77	0.00200891	1.32223e-07	0.00200833	2.91211	0.327815	0.65563	0.0658185	0.261996
Carley et al. 2014.	Krossá-Kækjudalsá	ISKK	Zircon	TLC6_ISKK@19.ais	Jan 2013.	R33 (δ18O = 5.55 ± 0.08 ‰, 2SD), Valley (2003)	2950148000	1382876	5927119	2842.26	0.00200909	9.12355e-08	0.00200852	3.00497	0.307408	0.614815	0.0454113	0.261996
Carley et al. 2014.	Krossá-Kækjudalsá	ISKK	Zircon	TLC6_ISKK@2.ais	Jan 2013.	R33 (δ18O = 5.55 ± 0.08 ‰, 2SD), Valley (2003)	2866058000	1236830	5757920	2749.79	0.002009	1.27432e-07	0.00200906	3.27522	0.325427	0.650854	0.0634305	0.261996
Carley et al. 2014.	Krossá-Kækjudalsá	ISKK	Zircon	TLC6_ISKK@3.ais	Jan 2013.	R33 (δ18O = 5.55 ± 0.08 ‰, 2SD), Valley (2003)	2772757000	4891699	5566995	9633.86	0.00200775	1.51547e-07	0.0020078	2.64848	0.337477	0.674955	0.0754812	0.261996
Carley et al. 2014.	Krossá-Kækjudalsá	ISKK	Zircon	TLC6_ISKK@4.ais	Jan 2013.	R33 (δ18O = 5.55 ± 0.08 ‰, 2SD), Valley (2003)	2870169000	572727	5766023	1147.32	0.00200895	1.30795e-07	0.002009	3.24825	0.327103	0.654205	0.0651064	0.261996
Carley et al. 2014.	Krossá-Kækjudalsá	ISKK	Zircon	TLC6_ISKK@5.ais	Jan 2013.	R33 (δ18O = 5.55 ± 0.08 ‰, 2SD), Valley (2003)	2848498000	677130	5723249	1376.15	0.00200922	1.15213e-07	0.00200927	3.38159	0.319338	0.638677	0.0573421	0.261996
Carley et al. 2014.	Krossá-Kækjudalsá	ISKK	Zircon	TLC6_ISKK@6.ais	Jan 2013.	R33 (δ18O = 5.55 ± 0.08 ‰, 2SD), Valley (2003)	2877262000	1600826	5781630	3178.05	0.00200942	1.10562e-07	0.00200918	3.33385	0.317018	0.634036	0.0550216	0.261996
Carley et al. 2014.	Krossá-Kækjudalsá	ISKK	Zircon	TLC6_ISKK@7.ais	Jan 2013.	R33 (δ18O = 5.55 ± 0.08 ‰, 2SD), Valley (2003)	2710177000	1814272	5444297	3793.63	0.00200883	1.11207e-07	0.00200859	3.04075	0.317355	0.63471	0.0553589	0.261996
Carley et al. 2014.	Krossá-Kækjudalsá	ISKK	Zircon	TLC6_ISKK@8.ais	Jan 2013.	R33 (δ18O = 5.55 ± 0.08 ‰, 2SD), Valley (2003)	2745622000	2176074	5515921	4568.49	0.00200899	1.2779e-07	0.00200874	3.11715	0.325606	0.651211	0.0636094	0.261996
Carley et al. 2014.	Krossá-Kækjudalsá	ISKK	Zircon	TLC6_ISKK@9.ais	Jan 2013.	R33 (δ18O = 5.55 ± 0.08 ‰, 2SD), Valley (2003)	2755695000	3280087	5534470	6618.76	0.00200838	1.48607e-07	0.00200813	2.81157	0.33599	0.67198	0.0739939	0.261996
Carley et al. 2014.	Storaá	ISS	Zircon	TLC2_ISS@10.ais	Jan 2013.	R33 (δ18O = 5.55 ± 0.08 ‰, 2SD), Valley (2003)	3191422000	5185002	6409166	10713.1	0.00200825	1.57966e-07	0.00200796	2.72799	0.440534	0.881068	0.0786587	0.361875
Carley et al. 2014.	Storaá	ISS	Zircon	TLC2_ISS@11.ais	Jan 2013.	R33 (δ18O = 5.55 ± 0.08 ‰, 2SD), Valley (2003)	3176934000	4382559	6384982	8802.46	0.00200979	1.02108e-07	0.00200951	3.50041	0.41268	0.825361	0.050805	0.361875
Carley et al. 2014.	Storaá	ISS	Zircon	TLC2_ISS@12.ais	Jan 2013.	R33 (δ18O = 5.55 ± 0.08 ‰, 2SD), Valley (2003)	3239369000	3801416	6508526	7795.14	0.0020092	1.37444e-07	0.00200891	3.20133	0.430283	0.860566	0.0684076	0.361875
Carley et al. 2014.	Storaá	ISS	Zircon	TLC2_ISS@13.ais	Jan 2013.	R33 (δ18O = 5.55 ± 0.08 ‰, 2SD), Valley (2003)	3250319000	4147017	6531544	8499	0.00200951	1.09882e-07	0.00200922	3.35761	0.416556	0.833112	0.0546809	0.361875
Carley et al. 2014.	Storaá	ISS	Zircon	TLC2_ISS@14.ais	Jan 2013.	R33 (δ18O = 5.55 ± 0.08 ‰, 2SD), Valley (2003)	3277025000	3879244	6585105	7793.46	0.00200948	1.14182e-07	0.00200919	3.34163	0.418697	0.837394	0.0568216	0.361875
Carley et al. 2014.	Storaá	ISS	Zircon	TLC2_ISS@15.ais	Jan 2013.	R33 (δ18O = 5.55 ± 0.08 ‰, 2SD), Valley (2003)	3340704000	2493423	6712117	5201.07	0.00200919	1.12509e-07	0.00200873	3.11183	0.417872	0.835744	0.0559969	0.361875
Carley et al. 2014.	Storaá	ISS	Zircon	TLC2_ISS@16.ais	Jan 2013.	R33 (δ18O = 5.55 ± 0.08 ‰, 2SD), Valley (2003)	3340730000	1923511	6713438	3995.6	0.00200957	7.62078e-08	0.00200911	3.30155	0.399798	0.799595	0.0379224	0.361875
Carley et al. 2014.	Storaá	ISS	Zircon	TLC2_ISS@17.ais	Jan 2013.	R33 (δ18O = 5.55 ± 0.08 ‰, 2SD), Valley (2003)	3277362000	11004250	6587293	21985.7	0.00200994	9.79994e-08	0.00200948	3.48478	0.410633	0.821265	0.0487574	0.361875
Carley et al. 2014.	Storaá	ISS	Zircon	TLC2_ISS@18.ais	Jan 2013.	R33 (δ18O = 5.55 ± 0.08 ‰, 2SD), Valley (2003)	3155798000	1968864	6341536	4037.01	0.00200949	1.00839e-07	0.00200903	3.25912	0.412057	0.824113	0.0501813	0.361875
Carley et al. 2014.	Storaá	ISS	Zircon	TLC2_ISS@19.ais	Jan 2013.	R33 (δ18O = 5.55 ± 0.08 ‰, 2SD), Valley (2003)	3237891000	1990452	6507204	4014.38	0.00200971	8.81937e-08	0.00200924	3.36796	0.405759	0.811518	0.0438839	0.361875
Carley et al. 2014.	Storaá	ISS	Zircon	TLC2_ISS@2.ais	Jan 2013.	R33 (δ18O = 5.55 ± 0.08 ‰, 2SD), Valley (2003)	2982737000	1506351	5990991	3189.03	0.00200855	1.01412e-07	0.00200861	3.05344	0.412365	0.82473	0.0504898	0.361875
Carley et al. 2014.	Storaá	ISS	Zircon	TLC2_ISS@20.ais	Jan 2013.	R33 (δ18O = 5.55 ± 0.08 ‰, 2SD), Valley (2003)	3285370000	3665250	6604180	7413.72	0.00201018	1.03085e-07	0.00200981	3.64929	0.413157	0.826314	0.0512815	0.361875
Carley et al. 2014.	Storaá	ISS	Zircon	TLC2_ISS@21.ais	Jan 2013.	R33 (δ18O = 5.55 ± 0.08 ‰, 2SD), Valley (2003)	3337745000	3572468	6706563	7220.26	0.00200931	7.70382e-08	0.00200894	3.21541	0.400216	0.800432	0.0383407	0.361875
Carley et al. 2014.	Storaá	ISS	Zircon	TLC2_ISS@22.ais	Jan 2013.	R33 (δ18O = 5.55 ± 0.08 ‰, 2SD), Valley (2003)	3334013000	3827287	6700866	7782.52	0.00200985	1.18574e-07	0.00200948	3.48502	0.420872	0.841744	0.0589966	0.361875
Carley et al. 2014.	Storaá	ISS	Zircon	TLC2_ISS@23.ais	Jan 2013.	R33 (δ18O = 5.55 ± 0.08 ‰, 2SD), Valley (2003)	3355241000	5648714	6743165	11375.3	0.00200974	5.46595e-08	0.00200937	3.4311	0.389073	0.778145	0.0271973	0.361875
Carley et al. 2014.	Storaá	ISS	Zircon	TLC2_ISS@24.ais	Jan 2013.	R33 (δ18O = 5.55 ± 0.08 ‰, 2SD), Valley (2003)	3411268000	3349774	6856109	7069.6	0.00200984	1.2451e-07	0.00200947	3.48103	0.423826	0.847651	0.0619503	0.361875
Carley et al. 2014.	Storaá	ISS	Zircon	TLC2_ISS@25.ais	Jan 2013.	R33 (δ18O = 5.55 ± 0.08 ‰, 2SD), Valley (2003)	3538005000	5345825	7111454	10871.6	0.00201002	1.00412e-07	0.0020095	3.49404	0.411831	0.823662	0.0499559	0.361875
Carley et al. 2014.	Storaá	ISS	Zircon	TLC2_ISS@26.ais	Jan 2013.	R33 (δ18O = 5.55 ± 0.08 ‰, 2SD), Valley (2003)	3381472000	2826771	6796427	5937.15	0.0020099	1.5109e-07	0.00200938	3.43563	0.437048	0.874097	0.0751731	0.361875
Carley et al. 2014.	Storaá	ISS	Zircon	TLC2_ISS@27.ais	Jan 2013.	R33 (δ18O = 5.55 ± 0.08 ‰, 2SD), Valley (2003)	3401181000	7626582	6833183	15671.3	0.00200906	1.38505e-07	0.00200854	3.01576	0.430816	0.861631	0.0689404	0.361875
Carley et al. 2014.	Storaá	ISS	Zircon	TLC2_ISS@28.ais	Jan 2013.	R33 (δ18O = 5.55 ± 0.08 ‰, 2SD), Valley (2003)	3427019000	1021866	6886920	1975.7	0.00200959	1.30128e-07	0.00200907	3.28286	0.426629	0.853258	0.0647535	0.361875
Carley et al. 2014.	Storaá	ISS	Zircon	TLC2_ISS@29.ais	Jan 2013.	R33 (δ18O = 5.55 ± 0.08 ‰, 2SD), Valley (2003)	3418476000	1977496	6870848	4141.76	0.00200992	1.21476e-07	0.00200939	3.44312	0.422314	0.844627	0.0604382	0.361875
Carley et al. 2014.	Storaá	ISS	Zircon	TLC2_ISS@3.ais	Jan 2013.	R33 (δ18O = 5.55 ± 0.08 ‰, 2SD), Valley (2003)	2973314000	2396693	5971503	4987.52	0.00200837	1.02707e-07	0.00200843	2.95906	0.413015	0.82603	0.0511396	0.361875
Carley et al. 2014.	Storaá	ISS	Zircon	TLC2_ISS@30.ais	Jan 2013.	R33 (δ18O = 5.55 ± 0.08 ‰, 2SD), Valley (2003)	3206188000	5710482	6442754	11503.9	0.00200948	1.08259e-07	0.00200805	2.76989	0.41575	0.831499	0.0538744	0.361875
Carley et al. 2014.	Storaá	ISS	Zircon	TLC2_ISS@31.ais	Jan 2013.	R33 (δ18O = 5.55 ± 0.08 ‰, 2SD), Valley (2003)	3407726000	3501275	6848635	7247.87	0.00200974	1.33993e-07	0.00200831	2.90063	0.428547	0.857095	0.0666722	0.361875
Carley et al. 2014.	Storaá	ISS	Zircon	TLC2_ISS@32.ais	Jan 2013.	R33 (δ18O = 5.55 ± 0.08 ‰, 2SD), Valley (2003)	3418120000	1786251	6870260	3681.34	0.00200995	9.88193e-08	0.00200852	3.00842	0.41104	0.822081	0.049165	0.361875
Carley et al. 2014.	Storaá	ISS	Zircon	TLC2_ISS@34.ais	Jan 2013.	R33 (δ18O = 5.55 ± 0.08 ‰, 2SD), Valley (2003)	3385071000	3625513	6804302	7326.91	0.00201009	1.33505e-07	0.00200866	3.07778	0.428293	0.856585	0.0664173	0.361875
Carley et al. 2014.	Storaá	ISS	Zircon	TLC2_ISS@35.ais	Jan 2013.	R33 (δ18O = 5.55 ± 0.08 ‰, 2SD), Valley (2003)	2059224000	9685937	4129522	18801.8	0.00200539	3.80354e-07	0.00200392	0.706812	0.551541	1.10308	0.189666	0.361875
Carley et al. 2014.	Storaá	ISS	Zircon	TLC2_ISS@36.ais	Jan 2013.	R33 (δ18O = 5.55 ± 0.08 ‰, 2SD), Valley (2003)	3520204000	4767206	7070827	9877.81	0.00200864	1.27975e-07	0.00200716	2.32709	0.425588	0.851175	0.0637122	0.361875
Carley et al. 2014.	Storaá	ISS	Zircon	TLC2_ISS@37.ais	Jan 2013.	R33 (δ18O = 5.55 ± 0.08 ‰, 2SD), Valley (2003)	3475692000	3292589	6987704	6670.53	0.00201045	1.25524e-07	0.00200897	3.23029	0.424311	0.848622	0.0624359	0.361875
Carley et al. 2014.	Storaá	ISS	Zircon	TLC2_ISS@38.ais	Jan 2013.	R33 (δ18O = 5.55 ± 0.08 ‰, 2SD), Valley (2003)	3455215000	5106755	6946870	10266.7	0.00201055	7.13159e-08	0.00200906	3.2782	0.397346	0.794692	0.0354709	0.361875
Carley et al. 2014.	Storaá	ISS	Zircon	TLC2_ISS@39.ais	Jan 2013.	R33 (δ18O = 5.55 ± 0.08 ‰, 2SD), Valley (2003)	3521507000	4391712	7078300	8926.44	0.00201002	1.40445e-07	0.00200854	3.01572	0.431748	0.863495	0.0698724	0.361875
Carley et al. 2014.	Storaá	ISS	Zircon	TLC2_ISS@4.ais	Jan 2013.	R33 (δ18O = 5.55 ± 0.08 ‰, 2SD), Valley (2003)	2962426000	2834834	5950364	5811.49	0.00200861	1.65377e-07	0.00200867	3.08191	0.444209	0.888418	0.0823339	0.361875
Carley et al. 2014.	Storaá	ISS	Zircon	TLC2_ISS@40.ais	Jan 2013.	R33 (δ18O = 5.55 ± 0.08 ‰, 2SD), Valley (2003)	3199888000	4961865	6432256	9856.22	0.00201015	1.07197e-07	0.00200919	3.3415	0.415203	0.830406	0.0533276	0.361875
Carley et al. 2014.	Storaá	ISS	Zircon	TLC2_ISS@41.ais	Jan 2013.	R33 (δ18O = 5.55 ± 0.08 ‰, 2SD), Valley (2003)	3134910000	1325714	6300321	2547.49	0.00200973	1.29201e-07	0.00200877	3.13136	0.426163	0.852326	0.0642875	0.361875
Carley et al. 2014.	Storaá	ISS	Zircon	TLC2_ISS@5.ais	Jan 2013.	R33 (δ18O = 5.55 ± 0.08 ‰, 2SD), Valley (2003)	2949450000	1578354	5926014	3329.79	0.00200919	1.08452e-07	0.00200925	3.37205	0.415853	0.831706	0.0539778	0.361875
Carley et al. 2014.	Storaá	ISS	Zircon	TLC2_ISS@7.ais	Jan 2013.	R33 (δ18O = 5.55 ± 0.08 ‰, 2SD), Valley (2003)	2945646000	1887734	5917488	4028.53	0.00200889	1.7269e-07	0.00200885	3.17291	0.447838	0.895676	0.0859628	0.361875
Carley et al. 2014.	Storaá	ISS	Zircon	TLC2_ISS@8.ais	Jan 2013.	R33 (δ18O = 5.55 ± 0.08 ‰, 2SD), Valley (2003)	2955622000	2604149	5938163	5204.93	0.00200911	9.10135e-08	0.00200907	3.28028	0.407176	0.814352	0.0453005	0.361875
Carley et al. 2014.	Storaá	ISS	Zircon	TLC2_ISS@9.ais	Jan 2013.	R33 (δ18O = 5.55 ± 0.08 ‰, 2SD), Valley (2003)	2933834000	3404713	5891549	6743.24	0.00200814	1.01472e-07	0.0020081	2.79689	0.412405	0.824811	0.0505302	0.361875
Carley et al. 2014.	Storaá	ISS	Zircon	TLC3_ISS@1.ais	Jan 2013.	R33 (δ18O = 5.55 ± 0.08 ‰, 2SD), Valley (2003)	3282730000	2538442	6604190	5066.19	0.0020118	9.74745e-08	0.00201157	4.52721	0.418042	0.836084	0.0484514	0.36959
Carley et al. 2014.	Storaá	ISS	Zircon	TLC3_ISS@10.ais	Jan 2013.	R33 (δ18O = 5.55 ± 0.08 ‰, 2SD), Valley (2003)	3571449000	1944092	7176710	3937.68	0.00200947	5.79152e-08	0.00200856	3.02561	0.398412	0.796823	0.0288212	0.36959
Carley et al. 2014.	Storaá	ISS	Zircon	TLC3_ISS@11.ais	Jan 2013.	R33 (δ18O = 5.55 ± 0.08 ‰, 2SD), Valley (2003)	3619815000	2313312	7274263	4789.72	0.00200957	9.22467e-08	0.00200865	3.0688	0.415494	0.830989	0.0459038	0.36959
Carley et al. 2014.	Storaá	ISS	Zircon	TLC3_ISS@12.ais	Jan 2013.	R33 (δ18O = 5.55 ± 0.08 ‰, 2SD), Valley (2003)	3633708000	2609572	7303216	5259.09	0.00200985	1.02263e-07	0.00200893	3.21106	0.420471	0.840943	0.0508808	0.36959
Carley et al. 2014.	Storaá	ISS	Zircon	TLC3_ISS@13.ais	Jan 2013.	R33 (δ18O = 5.55 ± 0.08 ‰, 2SD), Valley (2003)	3656768000	3198525	7348519	6549.85	0.00200957	8.43528e-08	0.00200864	3.0683	0.411566	0.823132	0.0419756	0.36959
Carley et al. 2014.	Storaá	ISS	Zircon	TLC3_ISS@14.ais	Jan 2013.	R33 (δ18O = 5.55 ± 0.08 ‰, 2SD), Valley (2003)	3631329000	1151487	7297260	2262.77	0.00200953	8.59537e-08	0.00200861	3.04983	0.412364	0.824727	0.042773	0.36959
Carley et al. 2014.	Storaá	ISS	Zircon	TLC3_ISS@2.ais	Jan 2013.	R33 (δ18O = 5.55 ± 0.08 ‰, 2SD), Valley (2003)	3619771000	1188048	7269804	2473.55	0.00200836	1.15235e-07	0.00200813	2.81055	0.426968	0.853937	0.0573779	0.36959
Carley et al. 2014.	Storaá	ISS	Zircon	TLC3_ISS@3.ais	Jan 2013.	R33 (δ18O = 5.55 ± 0.08 ‰, 2SD), Valley (2003)	3592568000	1455213	7216769	2980.12	0.0020088	5.61661e-08	0.00200857	3.03275	0.39755	0.795101	0.02796	0.36959
Carley et al. 2014.	Storaá	ISS	Zircon	TLC3_ISS@4.ais	Jan 2013.	R33 (δ18O = 5.55 ± 0.08 ‰, 2SD), Valley (2003)	3560472000	2996552	7153124	6173.45	0.00200904	1.0671e-07	0.00200881	3.14909	0.422706	0.845411	0.0531152	0.36959
Carley et al. 2014.	Storaá	ISS	Zircon	TLC3_ISS@6.ais	Jan 2013.	R33 (δ18O = 5.55 ± 0.08 ‰, 2SD), Valley (2003)	3546174000	1935056	7125771	3905.95	0.00200943	1.06137e-07	0.00200852	3.00464	0.42241	0.84482	0.0528196	0.36959
Carley et al. 2014.	Storaá	ISS	Zircon	TLC3_ISS@7.ais	Jan 2013.	R33 (δ18O = 5.55 ± 0.08 ‰, 2SD), Valley (2003)	3562520000	1865722	7157996	3919.36	0.00200925	1.28201e-07	0.00200834	2.91729	0.433396	0.866792	0.0638053	0.36959
Carley et al. 2014.	Storaá	ISS	Zircon	TLC3_ISS@8.ais	Jan 2013.	R33 (δ18O = 5.55 ± 0.08 ‰, 2SD), Valley (2003)	3238393000	2062426	6505047	4121.52	0.00200873	1.08849e-07	0.00200782	2.65624	0.423778	0.847557	0.054188	0.36959
Carley et al. 2014.	Storaá	ISS	Zircon	TLC3_ISS@9.ais	Jan 2013.	R33 (δ18O = 5.55 ± 0.08 ‰, 2SD), Valley (2003)	3565489000	1518500	7164726	3232.58	0.00200947	1.14391e-07	0.00200856	3.02461	0.426517	0.853033	0.0569261	0.36959
Carley et al. 2014.	Hvitserkur	IEHv-1c	Zircon	TLC6_IEHv@1.ais	Jan 2013.	R33 (δ18O = 5.55 ± 0.08 ‰, 2SD), Valley (2003)	2762834000	762572	5550995	1587.1	0.00200917	1.2633e-07	0.00200962	3.55773	0.324873	0.649746	0.0628767	0.261996
Carley et al. 2014.	Hvitserkur	IEHv-1c	Zircon	TLC6_IEHv@2.ais	Jan 2013.	R33 (δ18O = 5.55 ± 0.08 ‰, 2SD), Valley (2003)	2582988000	1452549	5199428	3035.03	0.00201295	1.2114e-07	0.00201341	5.44779	0.322176	0.644353	0.0601802	0.261996

## Sheet: Jan2013 O unreduced
#	16O	16O err	18O	18O err	18O/16O	18O/16O err			Known Values:		d18O	18O/16O			Linear corrections & plotting
#	_16O_	_16O_	_18O_	_18O_	_18O_/_16O_	_18O_/_16O_			R33		5.55	0.0020136			Standards				Unknowns
									AS3		5.34	0.0020132	(Trail et al., 2007)
#	0	2	0	2	0	2	18O/16O unk	18O/16O std	Alpha	Corr. 18/16	err	Corr d18O	1 s.e.	1 s.e. ext.	18O/16O		18/16 Corr	d18O	18O/16O	linear corr.	18/16 Corr	#
TLC4_R33@1.ais	2419134000	816868	4873449	1655.19	0.00201454	9.60012e-08		0.00201454							0.00201454	2.67e-08	0.00201452	6.00065				1
TLC4_R33@2.ais	2401439000	890167	4838251	1754.27	0.00201473	8.12354e-08		0.00201473							0.00201473	5.34e-08	0.00201468	6.0807				2
TLC4_R33@3.ais	2386354000	1724904	4807574	3307.91	0.00201461	1.70078e-07		0.00201461							0.00201461	8.01e-08	0.00201453	6.00794				3
TLC4_R33@4.ais	2396698000	1622865	4827455	3118.62	0.00201421	2.04748e-07		0.00201421							0.00201421	1.068e-07	0.0020141	5.79486				4
TLC4_R33@5.ais	2396956000	642503	4828125	1359.65	0.00201427	1.40383e-07		0.00201427							0.00201427	1.335e-07	0.00201414	5.81298				5
TLC4_R33@6.ais	2362892000	1511706	4760362	3050.02	0.00201463	2.06337e-07		0.00201463							0.00201463	1.602e-07	0.00201447	5.97893				6
TLC4_ISKK@1.ais	2434602000	1782776	4892173	3535.4	0.00200943	1.64115e-07	0.00200943			0.00200925	1.641e-07	3.36984	0.0816723	0.111661					0.00200943	1.869e-07	0.00200925	7
TLC4_ISKK@2.ais	2452638000	2256700	4929900	4477	0.00201004	1.768e-07	0.00201004			0.00200983	1.76781e-07	3.65863	0.0879583	0.111661					0.00201004	2.136e-07	0.00200983	8
TLC4_ISKK@3.ais	2449922000	1200513	4922448	2389.28	0.00200923	1.24223e-07	0.00200923			0.00200899	1.24208e-07	3.2388	0.0618264	0.111661					0.00200923	2.403e-07	0.00200899	9
TLC4_ISKK@4.ais	2434335000	341088	4892359	685.149	0.00200973	1.47484e-07	0.00200973			0.00200946	1.47465e-07	3.47765	0.0733851	0.111661					0.00200973	2.67e-07	0.00200946	10
TLC4_ISKK@5.ais	2439301000	942493	4902898	2028.04	0.00200996	1.40664e-07	0.00200996			0.00200967	1.40644e-07	3.57868	0.0699836	0.111661					0.00200996	2.937e-07	0.00200967	11
TLC4_R33@7.ais	2513292000	499027	5063756	986.359	0.00201479	1.23374e-07		0.00201479							0.00201479	3.204e-07	0.00201447	5.97733				12
TLC4_R33@8.ais	2511642000	798720	5059410	1703.44	0.00201438	1.29154e-07		0.00201438							0.00201438	3.471e-07	0.00201404	5.76075				13
TLC4_ISKK@6.ais	2527214000	1213777	5080199	2381.89	0.0020102	8.19278e-08	0.0020102			0.00200982	8.19126e-08	3.65703	0.0407561	0.111661					0.0020102	3.738e-07	0.00200982	14
TLC4_ISKK@7.ais	2548310000	744254	5122189	1434.9	0.00201003	1.05614e-07	0.00201003			0.00200963	1.05593e-07	3.5623	0.0525436	0.111661					0.00201003	4.005e-07	0.00200963	15
TLC4_ISKK@8.ais	2546499000	449732	5118473	943.202	0.00201	1.24974e-07	0.00201			0.00200958	1.24948e-07	3.53398	0.0621762	0.111661					0.00201	4.272e-07	0.00200958	16
TLC4_ISKK@9.ais	2516097000	303064	5058182	714.212	0.00201033	1.16553e-07	0.00201033			0.00200988	1.16527e-07	3.68295	0.0579773	0.111661					0.00201033	4.539e-07	0.00200988	17
TLC4_ISKK@10.ais	2490593000	1012488	5006944	2223.39	0.00201034	1.62801e-07	0.00201034			0.00200986	1.62762e-07	3.6761	0.0809817	0.111661					0.00201034	4.806e-07	0.00200986	18
TLC4_R33@9.ais	2470462000	611953	4978269	1156.08	0.00201512	1.81529e-07		0.00201512							0.00201512	5.073e-07	0.00201461	6.04729				19			Used linear correction for all unknowns
TLC4_R33@10.ais	2482060000	704462	5000988	1364.89	0.00201485	1.27627e-07		0.00201485							0.00201485	5.34e-07	0.00201432	5.90262				20
TLC4_ISKK@11.ais	2455160000	2329414	4935743	4727.15	0.00201035	1.60524e-07	0.00201035			0.00200979	1.60479e-07	3.6421	0.0798485	0.111661					0.00201035	5.607e-07	0.00200979	21
TLC4_ISKK@12.ais	2504422000	2105629	5032480	4287.91	0.00200944	1.61908e-07	0.00200944			0.00200885	1.6186e-07	3.17134	0.0805735	0.111661					0.00200944	5.874e-07	0.00200885	22
TLC4_ISKK@13.ais	2515189000	1283542	5056861	2676.6	0.00201053	1.43371e-07	0.00201053			0.00200991	1.43327e-07	3.70282	0.0713101	0.111661					0.00201053	6.141e-07	0.00200991	23
TLC4_ISKK@14.ais	2532126000	879456	5090893	1795.7	0.00201052	1.32523e-07	0.00201052			0.00200988	1.32481e-07	3.68549	0.0659147	0.111661					0.00201052	6.408e-07	0.00200988	24
TLC4_ISKK@15.ais	2526979000	688634	5081479	1370.11	0.00201089	1.47531e-07	0.00201089			0.00201022	1.47482e-07	3.85693	0.0733658	0.111661					0.00201089	6.675e-07	0.00201022	25
TLC4_R33@11.ais	2554552000	1503873	5147777	3159.64	0.00201514	1.41098e-07		0.00201514							0.00201514	6.942e-07	0.00201444	5.96444				26
TLC4_R33@12.ais	2561142000	691099	5161361	1413.66	0.00201526	9.87094e-08		0.00201526							0.00201526	7.209e-07	0.00201454	6.01104				27
TLC4_ISKK@16.ais	2542626000	436877	5113291	1047.81	0.00201103	9.08366e-08	0.00201103			0.00201028	9.08028e-08	3.88534	0.0451692	0.111661					0.00201103	7.476e-07	0.00201028	28
TLC4_ISKK@17.ais	2558195000	823813	5142853	1473.21	0.00201035	1.46229e-07	0.00201035			0.00200957	1.46172e-07	3.53094	0.0727381	0.111661					0.00201035	7.743e-07	0.00200957	29
TLC4_ISKK@18.ais	2561671000	998180	5150946	2155.73	0.00201077	1.19777e-07	0.00201077			0.00200997	1.19729e-07	3.73233	0.0595676	0.111661					0.00201077	8.01e-07	0.00200997	30
TLC4_ISKK@19.ais	2576278000	383818	5180240	1010.48	0.00201075	1.66217e-07	0.00201075			0.00200992	1.66149e-07	3.70452	0.0826644	0.111661					0.00201075	8.277e-07	0.00200992	31
TLC4_ISKK@20.ais	2557399000	802727	5143855	1743.78	0.00201136	1.80854e-07	0.00201136			0.00201051	1.80778e-07	3.9988	0.0899164	0.111661					0.00201136	8.544e-07	0.00201051	32
TLC4_R33@13.ais	2600601000	395522	5239849	923.601	0.00201486	1.04094e-07		0.00201486							0.00201486	8.811e-07	0.00201398	5.73278				33
TLC4_R33@14.ais	2555117000	725188	5150213	1582.11	0.00201565	1.08466e-07		0.00201565							0.00201565	9.078e-07	0.00201474	6.11146				34
TLC4_ISKK@21.ais	2575991000	976178	5179713	1860.2	0.00201076	1.19602e-07	0.00201076			0.00200983	1.19546e-07	3.66067	0.0594807	0.111661					0.00201076	9.345e-07	0.00200983	35
TLC4_ISKK@22.ais	2572871000	792796	5174800	1675.03	0.00201129	1.58489e-07	0.00201129			0.00201033	1.58413e-07	3.91151	0.0787994	0.111661					0.00201129	9.612e-07	0.00201033	36
TLC4_ISKK@23.ais	2553588000	490870	5135256	846.27	0.002011	1.5087e-07	0.002011			0.00201001	1.50795e-07	3.74986	0.0750222	0.111661					0.002011	9.879e-07	0.00201001	37
TLC4_ISKK@24.ais	2537896000	699871	5104259	1641.19	0.00201122	1.86468e-07	0.00201122			0.0020102	1.86374e-07	3.84639	0.0927141	0.111661					0.00201122	1.0146e-06	0.0020102	38
TLC4_ISKK@25.ais	2534011000	992658	5092812	1809.13	0.00200978	1.66464e-07	0.00200978			0.00200874	1.66378e-07	3.11695	0.0828269	0.111661					0.00200978	1.0413e-06	0.00200874	39
TLC4_R33@15.ais	2496198000	734352	5030602	1582.14	0.0020153	1.36737e-07		0.0020153							0.0020153	1.068e-06	0.00201424	5.86117				40
TLC4_R33@16.ais	2509039000	806622	5055963	1712.64	0.0020151	1.34977e-07		0.0020151							0.0020151	1.0947e-06	0.002014	5.74497				41
TLC4_ISKK@26.ais	2521059000	1745675	5069371	3511.1	0.00201081	1.01162e-07	0.00201081			0.00200969	1.01106e-07	3.58981	0.0503091	0.111661					0.00201081	1.1214e-06	0.00200969	42
TLC4_ISKK@27.ais	2554025000	619743	5135690	1313.09	0.00201082	1.3601e-07	0.00201082			0.00200967	1.35932e-07	3.58247	0.0676389	0.111661					0.00201082	1.1481e-06	0.00200967	43
TLC4_ISKK@28.ais	2587921000	1302977	5203578	2763.83	0.00201072	1.75092e-07	0.00201072			0.00200954	1.7499e-07	3.5167	0.0870794	0.111661					0.00201072	1.1748e-06	0.00200954	44
TLC4_ISKK@29.ais	2574146000	1304896	5176431	2606.18	0.00201093	1.28152e-07	0.00201093			0.00200973	1.28075e-07	3.61074	0.0637275	0.111661					0.00201093	1.2015e-06	0.00200973	45
TLC4_ISKK@30.ais	2582479000	1306426	5193731	2607.39	0.00201114	1.73552e-07	0.00201114			0.00200991	1.73446e-07	3.70227	0.0862952	0.111661					0.00201114	1.2282e-06	0.00200991	46
TLC4_R33@17.ais	2540689000	1035613	5121549	2087.42	0.00201581	1.02028e-07		0.00201581							0.00201581	1.2549e-06	0.00201456	6.02052				47
TLC4_R33@18.ais	2561202000	931304	5162352	2045.64	0.0020156	1.45872e-07		0.0020156							0.0020156	1.2816e-06	0.00201432	5.90032				48
TLC4_ISKK@31.ais	2612602000	416361	5253268	878.236	0.00201074	6.20036e-08	0.00201074			0.00200943	6.19632e-08	3.46202	0.0308362	0.111661					0.00201074	1.3083e-06	0.00200943	49
TLC4_ISKK@32.ais	2582391000	1101556	5193359	2238.68	0.00201107	1.21826e-07	0.00201107			0.00200973	1.21745e-07	3.61099	0.0605777	0.111661					0.00201107	1.335e-06	0.00200973	50
TLC4_ISKK@33.ais	2618304000	1069572	5264674	2191.72	0.00201072	1.29481e-07	0.00201072			0.00200936	1.29394e-07	3.42437	0.0643955	0.111661					0.00201072	1.3617e-06	0.00200936	51
TLC4_ISKK@34.ais	2623705000	622918	5277008	1277.13	0.00201128	1.16585e-07	0.00201128			0.00200989	1.16504e-07	3.69169	0.0579655	0.111661					0.00201128	1.3884e-06	0.00200989	52
TLC4_ISKK@35.ais	2602007000	1689658	5232005	3487.29	0.00201076	1.48958e-07	0.00201076			0.00200934	1.48853e-07	3.41668	0.0740804	0.111661					0.00201076	1.4151e-06	0.00200934	53
TLC4_R33@19.ais	2586244000	1944349	5213136	3926.83	0.00201572	8.69342e-08		0.00201572							0.00201572	1.4418e-06	0.00201428	5.88025				54
TLC4_R33@20.ais	2566644000	785074	5174583	1563.05	0.00201609	1.27168e-07		0.00201609							0.00201609	1.4685e-06	0.00201462	6.05268				55
TLC4_ISKK@36.ais	2630651000	1325970	5290881	2660.11	0.00201124	1.32961e-07	0.00201124			0.00200975	1.32862e-07	3.61988	0.0661088	0.111661					0.00201124	1.4952e-06	0.00200975	56
TLC4_ISKK@37.ais	2620237000	1278724	5269659	2744.89	0.00201114	1.83271e-07	0.00201114			0.00200962	1.83132e-07	3.55361	0.091128	0.111661					0.00201114	1.5219e-06	0.00200962	57
TLC4_ISKK@38.ais	2642233000	350574	5313651	922.113	0.00201105	1.60625e-07	0.00201105			0.0020095	1.60501e-07	3.49433	0.0798712	0.111661					0.00201105	1.5486e-06	0.0020095	58
TLC4_ISKK@39.ais	2621650000	550756	5272302	1202.37	0.00201106	1.46906e-07	0.00201106			0.00200949	1.46791e-07	3.48949	0.0730488	0.111661					0.00201106	1.5753e-06	0.00200949	59
TLC4_R33@21.ais	2611233000	821070	5264209	1701.31	0.00201599	1.16177e-07		0.00201599							0.00201599	1.602e-06	0.00201438	5.93458				60
TLC4_R33@22.ais	2581630000	851051	5204889	1755.28	0.00201613	1.15508e-07		0.00201613							0.00201613	1.6287e-06	0.0020145	5.99066				61
TLC6_R33@1.ais	2926859000	1343988	5891105	2899.36	0.00201277	1.34677e-07			0.99959						0.00201277			5.13059				62
TLC6_R33@2.ais	2925146000	693031	5887100	1521.13	0.00201258	1.07615e-07			0.999495						0.00201258			5.03571				63
TLC6_IEHv@1.ais	2762834000	762572	5550995	1587.1	0.00200917	1.2633e-07				0.00200962	1.26359e-07	3.55773	0.0628767	0.261996					0.00200917			64
TLC6_IEHv@2.ais	2582988000	1452549	5199428	3035.03	0.00201295	1.2114e-07				0.00201341	1.21167e-07	5.44779	0.0601802	0.261996					0.00201295			65
TLC6_IXSd@1.ais	2684670000	4331909	5393451	8673.67	0.00200898	1.04414e-07				0.00200944	1.04438e-07	3.46482	0.0519735	0.261996					0.00200898			66
TLC6_IEKlT@1.ais	2779022000	1158313	5579649	2277.29	0.00200777	1.42357e-07				0.00200823	1.42389e-07	2.86244	0.0709028	0.261996					0.00200777			67
TLC6_IEKlT@2.ais	2747158000	919860	5515302	1809.24	0.00200764	1.43971e-07				0.0020081	1.44004e-07	2.79451	0.0717118	0.261996					0.00200764			68
TLC6_R33@3.ais	2841808000	508502	5721226	1015.12	0.00201323	8.95293e-08			0.999819						0.00201323			5.3608				69
TLC6_R33@4.ais	2806969000	1791443	5653163	3843.46	0.00201397	1.19333e-07			1.00019						0.00201397			5.72984				70
TLC6_IEKlT@3.ais	2708212000	3309211	5438403	6427.17	0.00200812	1.46766e-07				0.00200795	1.46754e-07	2.71972	0.0730866	0.261996					0.00200812			71
TLC6_IEKlT@4.ais	2663516000	1571406	5345598	3167.16	0.00200697	1.00482e-07				0.0020068	1.00474e-07	2.14698	0.0500666	0.261996					0.00200697			72
TLC6_IEKlT@5.ais	2641186000	920059	5303071	1838.82	0.00200784	1.59408e-07				0.00200767	1.59395e-07	2.5799	0.079393	0.261996					0.00200784			73
TLC6_IEKlT@6.ais	2725245000	1786664	5469927	3485.96	0.00200713	1.03893e-07				0.00200696	1.03884e-07	2.22787	0.0517617	0.261996					0.00200713			74
TLC6_IEKlT@7.ais	2717799000	370080	5457747	968.304	0.00200815	1.81624e-07				0.00200798	1.81609e-07	2.73619	0.0904435	0.261996					0.00200815			75
TLC6_R33@5.ais	2823069000	1444580	5686255	3003.32	0.00201421	8.83425e-08			1.0003						0.00201421			5.84769				76
TLC6_R33@6.ais	2818353000	707464	5675221	1365.2	0.00201367	1.25007e-07			1.00003						0.00201367			5.57603				77
TLC6_IEKlT@8.ais	2696499000	1423802	5418017	2976.93	0.00200928	1.2136e-07				0.00200921	1.21356e-07	3.35226	0.0603996	0.261996					0.00200928			78
TLC6_IEKlT@9.ais	2729969000	2035658	5481590	3928.23	0.00200793	1.36978e-07				0.00200787	1.36974e-07	2.68012	0.0682185	0.261996					0.00200793			79
TLC6_IEAC1.ais	2576712000	4452909	5189705	9145.87	0.00201408	1.04143e-07				0.00201401	1.0414e-07	5.74968	0.0517077	0.261996					0.00201408			80
TLC6_IEKlM@1.ais	2771857000	3254723	5571846	6488.24	0.00201015	1.33325e-07				0.00201008	1.3332e-07	3.7872	0.0663258	0.261996					0.00201015			81			Used standard bracketing for all unknowns; excluded last standard
TLC6_IEKlM@2.ais	2823103000	1306569	5674426	2682.3	0.00201	1.16749e-07				0.00200993	1.16745e-07	3.7108	0.0580842	0.261996					0.00201			82			Tamara made a note about some of these standards, but they look fine here, so I left them in.
TLC6_R33@7.ais	2885291000	547658	5809200	1021.55	0.00201338	5.62865e-08			0.999893						0.00201338			5.43571				83
TLC6_R33@8.ais	2894316000	526854	5827418	1324.98	0.0020134	1.67091e-07			0.999901						0.0020134			5.4432				84
TLC6_ISKK@1.ais	2874519000	921176	5771690	1995.43	0.00200788	1.04135e-07				0.00200794	1.04138e-07	2.7144	0.0518633	0.261996					0.00200788			85
TLC6_ISKK@2.ais	2866058000	1236830	5757920	2749.79	0.002009	1.27432e-07				0.00200906	1.27436e-07	3.27522	0.0634305	0.261996					0.002009			86
TLC6_ISKK@3.ais	2772757000	4891699	5566995	9633.86	0.00200775	1.51547e-07				0.0020078	1.51551e-07	2.64848	0.0754812	0.261996					0.00200775			87
TLC6_ISKK@4.ais	2870169000	572727	5766023	1147.32	0.00200895	1.30795e-07				0.002009	1.30799e-07	3.24825	0.0651064	0.261996					0.00200895			88
TLC6_ISKK@5.ais	2848498000	677130	5723249	1376.15	0.00200922	1.15213e-07				0.00200927	1.15216e-07	3.38159	0.0573421	0.261996					0.00200922			89
TLC6_R33@9.ais	2883229000	1657586	5805670	3267.95	0.0020136	1.27295e-07			1						0.0020136			5.54307				90
TLC6_R33@10.ais	2873272000	3849506	5786172	7682.45	0.00201379	1.01826e-07			1.0001						0.00201379			5.63895				91
TLC6_ISKK@6.ais	2877262000	1600826	5781630	3178.05	0.00200942	1.10562e-07				0.00200918	1.10548e-07	3.33385	0.0550216	0.261996					0.00200942			92
TLC6_ISKK@7.ais	2710177000	1814272	5444297	3793.63	0.00200883	1.11207e-07				0.00200859	1.11193e-07	3.04075	0.0553589	0.261996					0.00200883			93
TLC6_ISKK@8.ais	2745622000	2176074	5515921	4568.49	0.00200899	1.2779e-07				0.00200874	1.27775e-07	3.11715	0.0636094	0.261996					0.00200899			94
TLC6_ISKK@9.ais	2755695000	3280087	5534470	6618.76	0.00200838	1.48607e-07				0.00200813	1.48589e-07	2.81157	0.0739939	0.261996					0.00200838			95
TLC6_ISKK@10.ais	2868387000	1860009	5764217	3759.26	0.00200957	1.16987e-07				0.00200932	1.16973e-07	3.40675	0.0582149	0.261996					0.00200957			96
TLC6_R33@11.ais	2885039000	1337008	5810160	2737.47	0.00201389	7.10883e-08			1.00015						0.00201389			5.68939				97
TLC6_R33@12.ais	2836245000	606641	5712473	1508.03	0.0020141	1.70877e-07			1.00025						0.0020141			5.79126				98
TLC6_ISKK@11.ais	2877349000	1187077	5780526	2250.9	0.00200898	1.34463e-07				0.00200853	1.34434e-07	3.01105	0.0669314	0.261996					0.00200898			99
TLC6_ISKK@12.ais	2877837000	938373	5783416	2003.23	0.00200964	9.54364e-08				0.00200919	9.54152e-08	3.34256	0.0474893	0.261996					0.00200964			100
TLC6_ISKK@13.ais	2871701000	1334837	5769254	2948.37	0.002009	1.89533e-07				0.00200856	1.89491e-07	3.02403	0.0943419	0.261996					0.002009			101
TLC6_ISKK@14.ais	2884558000	1040603	5795668	2249.11	0.00200921	1.16401e-07				0.00200876	1.16375e-07	3.12538	0.057934	0.261996					0.00200921			102
TLC6_ISKK@15.ais	2868120000	812796	5765311	1700.98	0.00201014	9.41108e-08				0.00200969	9.40899e-08	3.5902	0.0468181	0.261996					0.00201014			103
TLC6_R33@13.ais	2656545000	2140964	5349985	4437.28	0.00201389	1.57842e-07			1.00014						0.00201389			5.68689				104
TLC6_R33@14.ais	2840764000	669858	5722186	1340.8	0.00201431	1.08111e-07			1.00035						0.00201431			5.89863				105
TLC6_ISKK@16.ais	2882339000	1370182	5791539	2495.78	0.00200932	1.54456e-07				0.00200874	1.54412e-07	3.1183	0.07687	0.261996					0.00200932			106
TLC6_ISKK@17.ais	2923648000	2013032	5874064	4008.26	0.00200916	1.17532e-07				0.00200858	1.17498e-07	3.03692	0.0584982	0.261996					0.00200916			107
TLC6_ISKK@18.ais	2929463000	2021545	5885015	4111.77	0.00200891	1.32223e-07				0.00200833	1.32185e-07	2.91211	0.0658185	0.261996					0.00200891			108
TLC6_ISKK@19.ais	2950148000	1382876	5927119	2842.26	0.00200909	9.12355e-08				0.00200852	9.12094e-08	3.00497	0.0454113	0.261996					0.00200909			109
TLC6_R33@15.ais	2903837000	1569786	5849280	3123.74	0.00201433	1.43589e-07			1.00036						0.00201433			5.90662				110
TLC6_R33@16.ais	2832502000	2830845	5710873	5682.49	0.00201619	1.28869e-07									0.00201619							111
TLC2_R33@2.ais	3031570000	1862617	6103842	3748.62	0.00201343	1.27595e-07			0.999914						0.00201343			5.45618				112
TLC2_ISS@1.ais	2752423000	1351047	5537102	2578.7	0.00201172	1.32451e-07				0.00201178	1.32455e-07	4.63351	0.0658396	0.361875					0.00201172			113
TLC2_ISS@2.ais	2982737000	1506351	5990991	3189.03	0.00200855	1.01412e-07				0.00200861	1.01415e-07	3.05344	0.0504898	0.361875					0.00200855			114
TLC2_ISS@3.ais	2973314000	2396693	5971503	4987.52	0.00200837	1.02707e-07				0.00200843	1.0271e-07	2.95906	0.0511396	0.361875					0.00200837			115
TLC2_ISS@4.ais	2962426000	2834834	5950364	5811.49	0.00200861	1.65377e-07				0.00200867	1.65382e-07	3.08191	0.0823339	0.361875					0.00200861			116
TLC2_ISS@5.ais	2949450000	1578354	5926014	3329.79	0.00200919	1.08452e-07				0.00200925	1.08455e-07	3.37205	0.0539778	0.361875					0.00200919			117
TLC2_R33@3.ais	2922580000	1014129	5885480	2209.7	0.0020138	1.15111e-07			1.0001						0.0020138			5.64045				118
TLC2_R33@4.ais	2911989000	2184356	5862998	4365	0.0020134	9.52178e-08			0.999901						0.0020134			5.4432				119
TLC2_ISS@6.ais	2676624000	4637322	5417584	9434.16	0.00202404	1.17893e-07				0.002024	1.17891e-07	10.7348	0.0582467	0.361875					0.00202404			120
TLC2_ISS@7.ais	2945646000	1887734	5917488	4028.53	0.00200889	1.7269e-07				0.00200885	1.72687e-07	3.17291	0.0859628	0.361875					0.00200889			121
TLC2_ISS@8.ais	2955622000	2604149	5938163	5204.93	0.00200911	9.10135e-08				0.00200907	9.10118e-08	3.28028	0.0453005	0.361875					0.00200911			122
TLC2_ISS@9.ais	2933834000	3404713	5891549	6743.24	0.00200814	1.01472e-07				0.0020081	1.0147e-07	2.79689	0.0505302	0.361875					0.00200814			123
TLC2_R33@5.ais	3026155000	4188909	6093840	8599.16	0.00201372	1.40582e-07			1.00006						0.00201372			5.60449				124
TLC2_R33@6.ais	3103636000	4110760	6259611	8567.86	0.00201686	1.29188e-07									0.00201686							125
TLC2_ISS@10.ais	3191422000	5185002	6409166	10713.1	0.00200825	1.57966e-07				0.00200796	1.57944e-07	2.72799	0.0786587	0.361875					0.00200825			126
TLC2_ISS@11.ais	3176934000	4382559	6384982	8802.46	0.00200979	1.02108e-07				0.00200951	1.02093e-07	3.50041	0.050805	0.361875					0.00200979			127
TLC2_ISS@12.ais	3239369000	3801416	6508526	7795.14	0.0020092	1.37444e-07				0.00200891	1.37425e-07	3.20133	0.0684076	0.361875					0.0020092			128
TLC2_ISS@13.ais	3250319000	4147017	6531544	8499	0.00200951	1.09882e-07				0.00200922	1.09866e-07	3.35761	0.0546809	0.361875					0.00200951			129
TLC2_ISS@14.ais	3277025000	3879244	6585105	7793.46	0.00200948	1.14182e-07				0.00200919	1.14165e-07	3.34163	0.0568216	0.361875					0.00200948			130
TLC2_R33@7.ais	3327658000	3783611	6709247	7744.46	0.00201621	1.23193e-07									0.00201621							131			Used standard bracketing for all unknowns; excluded standards 6 & 7
TLC2_R33@8.ais	3343306000	3954539	6733576	7977.92	0.00201405	1.17531e-07			1.00022						0.00201405			5.76629				132
TLC2_ISS@15.ais	3340704000	2493423	6712117	5201.07	0.00200919	1.12509e-07				0.00200873	1.12483e-07	3.11183	0.0559969	0.361875					0.00200919			133
TLC2_ISS@16.ais	3340730000	1923511	6713438	3995.6	0.00200957	7.62078e-08				0.00200911	7.61904e-08	3.30155	0.0379224	0.361875					0.00200957			134
TLC2_ISS@17.ais	3277362000	11004250	6587293	21985.7	0.00200994	9.79994e-08				0.00200948	9.79769e-08	3.48478	0.0487574	0.361875					0.00200994			135
TLC2_ISS@18.ais	3155798000	1968864	6341536	4037.01	0.00200949	1.00839e-07				0.00200903	1.00816e-07	3.25912	0.0501813	0.361875					0.00200949			136
TLC2_ISS@19.ais	3237891000	1990452	6507204	4014.38	0.00200971	8.81937e-08				0.00200924	8.81735e-08	3.36796	0.0438839	0.361875					0.00200971			137
TLC2_R33@9.ais	3274744000	1923922	6595261	4104.01	0.00201398	1.14194e-07			1.00019						0.00201398			5.73134				138
TLC2_R33@10.ais	3269752000	3498675	6585806	6948.74	0.00201416	1.00984e-07			1.00028						0.00201416			5.82322				139
TLC2_ISS@20.ais	3285370000	3665250	6604180	7413.72	0.00201018	1.03085e-07				0.00200981	1.03066e-07	3.64929	0.0512815	0.361875					0.00201018			140
TLC2_ISS@21.ais	3337745000	3572468	6706563	7220.26	0.00200931	7.70382e-08				0.00200894	7.7024e-08	3.21541	0.0383407	0.361875					0.00200931			141
TLC2_ISS@22.ais	3334013000	3827287	6700866	7782.52	0.00200985	1.18574e-07				0.00200948	1.18552e-07	3.48502	0.0589966	0.361875					0.00200985			142
TLC2_ISS@23.ais	3355241000	5648714	6743165	11375.3	0.00200974	5.46595e-08				0.00200937	5.46494e-08	3.4311	0.0271973	0.361875					0.00200974			143
TLC2_ISS@24.ais	3411268000	3349774	6856109	7069.6	0.00200984	1.2451e-07				0.00200947	1.24487e-07	3.48103	0.0619503	0.361875					0.00200984			144
TLC2_R33@11.ais	3416946000	3221060	6881191	6839.99	0.00201384	1.38145e-07			1.00012						0.00201384			5.66342				145
TLC2_R33@12.ais	3416674000	2895758	6880861	6148.04	0.0020139	1.59181e-07			1.00015						0.0020139			5.69538				146
TLC2_ISS@25.ais	3538005000	5345825	7111454	10871.6	0.00201002	1.00412e-07				0.0020095	1.00386e-07	3.49404	0.0499559	0.361875					0.00201002			147
TLC2_ISS@26.ais	3381472000	2826771	6796427	5937.15	0.0020099	1.5109e-07				0.00200938	1.51051e-07	3.43563	0.0751731	0.361875					0.0020099			148
TLC2_ISS@27.ais	3401181000	7626582	6833183	15671.3	0.00200906	1.38505e-07				0.00200854	1.38469e-07	3.01576	0.0689404	0.361875					0.00200906			149
TLC2_ISS@28.ais	3427019000	1021866	6886920	1975.7	0.00200959	1.30128e-07				0.00200907	1.30095e-07	3.28286	0.0647535	0.361875					0.00200959			150
TLC2_ISS@29.ais	3418476000	1977496	6870848	4141.76	0.00200992	1.21476e-07				0.00200939	1.21444e-07	3.44312	0.0604382	0.361875					0.00200992			151
TLC2_R33@13.ais	3400647000	2460876	6849575	5220.08	0.0020142	1.26454e-07			1.0003						0.0020142			5.8412				152
TLC2_R33@14.ais	3400329000	3580229	6850122	7369.02	0.00201455	1.13933e-07			1.00047						0.00201455			6.01548				153
TLC2_ISS@30.ais	3206188000	5710482	6442754	11503.9	0.00200948	1.08259e-07				0.00200805	1.08182e-07	2.76989	0.0538744	0.361875					0.00200948			154
TLC2_ISS@31.ais	3407726000	3501275	6848635	7247.87	0.00200974	1.33993e-07				0.00200831	1.33898e-07	2.90063	0.0666722	0.361875					0.00200974			155
TLC2_ISS@32.ais	3418120000	1786251	6870260	3681.34	0.00200995	9.88193e-08				0.00200852	9.8749e-08	3.00842	0.049165	0.361875					0.00200995			156
TLC2_ISS@33.ais	3085285000	3475491	6248546	7237.36	0.00202527	1.44058e-07				0.00202383	1.43956e-07	10.6529	0.0711303	0.361875					0.00202527			157
TLC2_ISS@34.ais	3385071000	3625513	6804302	7326.91	0.00201009	1.33505e-07				0.00200866	1.3341e-07	3.07778	0.0664173	0.361875					0.00201009			158
TLC2_R33@15.ais	3459645000	3323771	6974110	6923.6	0.00201585	1.16089e-07			1.00111						0.00201585			6.66417				159
TLC2_R33@16.ais	3487065000	8910023	7028321	17805.1	0.00201554	9.70095e-08			1.00096						0.00201554			6.51236				160
TLC2_ISS@35.ais	2059224000	9685937	4129522	18801.8	0.00200539	3.80354e-07				0.00200392	3.80074e-07	0.706812	0.189666	0.361875					0.00200539			161
TLC2_ISS@36.ais	3520204000	4767206	7070827	9877.81	0.00200864	1.27975e-07				0.00200716	1.27881e-07	2.32709	0.0637122	0.361875					0.00200864			162
TLC2_ISS@37.ais	3475692000	3292589	6987704	6670.53	0.00201045	1.25524e-07				0.00200897	1.25432e-07	3.23029	0.0624359	0.361875					0.00201045			163
TLC2_ISS@38.ais	3455215000	5106755	6946870	10266.7	0.00201055	7.13159e-08				0.00200906	7.12633e-08	3.2782	0.0354709	0.361875					0.00201055			164
TLC2_ISS@39.ais	3521507000	4391712	7078300	8926.44	0.00201002	1.40445e-07				0.00200854	1.40341e-07	3.01572	0.0698724	0.361875					0.00201002			165
TLC2_R33@17.ais	3531203000	2618742	7112724	5194.88	0.00201425	1.3344e-07			1.00032						0.00201425			5.86767				166
TLC2_R33@18.ais	3359714000	4402863	6768826	8775.13	0.0020147	1.05711e-07			1.00055						0.0020147			6.09388				167
TLC2_ISS@40.ais	3199888000	4961865	6432256	9856.22	0.00201015	1.07197e-07				0.00200919	1.07145e-07	3.3415	0.0533276	0.361875					0.00201015			168
TLC2_ISS@41.ais	3134910000	1325714	6300321	2547.49	0.00200973	1.29201e-07				0.00200877	1.29139e-07	3.13136	0.0642875	0.361875					0.00200973			169
TLC2_R33@19.ais	3046235000	11342220	6138245	22804.9	0.00201503	1.15787e-07			1.00071						0.00201503			6.25568				170
TLC2_R33@21.ais	2821165000	1326437	5682580	2640.24	0.00201427	1.18358e-07			1.00033						0.00201427			5.87615				171
TLC2_ERLA139.ais	2823136000	1325257	5713092	2509.81	0.00202367	1.2896e-07				0.00202306	1.28922e-07	10.2672	0.063726	0.361875					0.00202367			172
TLC2_IXSD@1.ais	2800368000	1654516	5626305	3368.4	0.00200913	1.31831e-07				0.00200853	1.31791e-07	3.0095	0.0656159	0.361875					0.00200913			173
TLC2_IXSD@2.ais	2780481000	4849338	5585419	9680.18	0.0020088	1.50971e-07				0.00200819	1.50926e-07	2.84276	0.0751551	0.361875					0.0020088			174
TLC2_IXSD@3.ais	2640750000	9117537	5305115	18180	0.00200894	1.86917e-07				0.00200834	1.86861e-07	2.91615	0.0930424	0.361875					0.00200894			175
TLC2_IXSD@4.ais	2790027000	4732809	5606456	9741.92	0.00200946	1.1096e-07				0.00200886	1.10927e-07	3.17475	0.055219	0.361875					0.00200946			176
TLC2_R33@22.ais	2815696000	1481131	5670080	3028.28	0.00201374	1.0119e-07			1.00007						0.00201374			5.61298				177
TLC2_R33@23.ais	2869523000	1855439	5778616	3729.98	0.00201379	1.43654e-07			1.00009						0.00201379			5.63795				178
TLC2_IXSD@5.ais	2772010000	708296	5570587	1307.49	0.00200958	1.78575e-07				0.00200898	1.78521e-07	3.23602	0.0888617	0.361875					0.00200958			179
TLC2_ISKK@1.ais	2831161000	2695376	5689166	5545.73	0.00200948	9.00473e-08				0.00200888	9.00203e-08	3.1846	0.0448112	0.361875					0.00200948			180
TLC2_ISKK@2.ais	2880599000	3238682	5788979	6581.59	0.00200964	1.03651e-07				0.00200904	1.0362e-07	3.26598	0.0515768	0.361875					0.00200964			181
TLC2_ISKK@3.ais	2870527000	2354144	5768810	4613.9	0.00200967	1.63751e-07				0.00200907	1.63702e-07	3.27896	0.0814817	0.361875					0.00200967			182
TLC2_ISKK@4.ais	2645863000	1208940	5321961	2388.76	0.00201143	1.33246e-07				0.00201082	1.33206e-07	4.1566	0.0662444	0.361875					0.00201143			183
TLC2_R33@24.ais	2864458000	2824213	5770627	6023.72	0.00201456	1.83566e-07			1.00048						0.00201456			6.02297				184
TLC2_R33@25.ais	2881191000	2516354	5804824	5366.75	0.00201473	1.70309e-07			1.00056						0.00201473			6.10737				185
TLC2_ISKK@5.ais	2866887000	6712355	5760532	13679.4	0.00200933	1.19948e-07				0.00200847	1.19897e-07	2.97988	0.0596956	0.361875					0.00200933			186
TLC2_ISKK@6.ais	2906507000	940473	5841302	2064.33	0.00200973	1.37311e-07				0.00200887	1.37252e-07	3.18004	0.068323	0.361875					0.00200973			187
TLC2_ISKK@7.ais	2927811000	5178312	5884076	10537.7	0.00200972	9.33013e-08				0.00200885	9.32612e-08	3.17256	0.0464251	0.361875					0.00200972			188
TLC2_ISKK@8.ais	1150082000	7319219	2306957	14605.8	0.00200591	4.02305e-07				0.00200505	4.02132e-07	1.27275	0.200559	0.361875					0.00200591			189
TLC2_ISKK@9.ais	2739832000	2843769	5502090	5881.69	0.00200818	1.50037e-07				0.00200732	1.49973e-07	2.40684	0.0747128	0.361875					0.00200818			190
TLC2_R33@26.ais	2939071000	1380908	5919759	2735.38	0.00201416	1.58277e-07			1.00028						0.00201416			5.82272				191
TLC2_R33@27.ais	2948257000	2173418	5939020	4427.28	0.00201442	1.40246e-07			1.00041						0.00201442			5.95106				192
TLC2_ISKK@10.ais	2972698000	2682801	5974342	5386.55	0.00200974	1.12902e-07				0.00200899	1.1286e-07	3.24056	0.0561776	0.361875					0.00200974			193
TLC2_ISKK@11.ais	2943463000	1548394	5915352	3078.76	0.00200966	1.78604e-07				0.00200891	1.78538e-07	3.20112	0.0888728	0.361875					0.00200966			194
TLC2_ISKK@12.ais	2964541000	1009379	5957940	2265.35	0.00200973	1.05671e-07				0.00200899	1.05631e-07	3.23906	0.0525794	0.361875					0.00200973			195
TLC2_ISKK@13.ais	2927002000	917985	5881485	1800.2	0.00200939	1.22514e-07				0.00200864	1.22468e-07	3.06684	0.0609706	0.361875					0.00200939			196
TLC2_ISKK@14.ais	2912942000	4322480	5853399	8975.58	0.00200944	1.27951e-07				0.0020087	1.27903e-07	3.09429	0.0636746	0.361875					0.00200944			197
TLC2_R33@28.ais	2937252000	1178050	5916993	2463.32	0.00201447	1.13643e-07			1.00043						0.00201447			5.97553				198
TLC2_R33@29.ais	2946565000	3031296	5935428	6108.68	0.00201435	9.38356e-08			1.00037						0.00201435			5.9201				199
TLC2_ISKK@15.ais	2924277000	4354164	5877552	8820.68	0.00200992	1.20685e-07				0.00200832	1.20589e-07	2.90485	0.0600446	0.361875					0.00200992			200
TLC2_ISKK@16.ais	2985589000	3247397	5991043	6486.39	0.00200665	1.19312e-07				0.00200506	1.19217e-07	1.27718	0.059458	0.361875					0.00200665			201
TLC2_ISKK@17.ais	2747308000	5960656	5520473	11978.6	0.00200941	9.0751e-08				0.00200781	9.06788e-08	2.65336	0.045163	0.361875					0.00200941			202
TLC2_ISKK@18.ais	2891902000	4128110	5811254	8367.91	0.00200949	1.55328e-07				0.00200789	1.55205e-07	2.69328	0.0772972	0.361875					0.00200949			203
TLC2_ISKK@19.ais	2982323000	921729	5992653	2062.57	0.00200939	1.47291e-07				0.00200779	1.47174e-07	2.64288	0.0733013	0.361875					0.00200939			204
TLC2_R33@30.ais	2976338000	2613965	6000136	5327.55	0.00201594	1.16743e-07			1.00116						0.00201594			6.71411				205
TLC2_R33@31.ais	2953970000	1928543	5955339	3745.81	0.00201605	1.25434e-07			1.00122						0.00201605			6.76504				206
TLC2_ISKK@20.ais	2949084000	889988	5926984	1815.56	0.00200977	1.20652e-07				0.00200789	1.2054e-07	2.69368	0.0600329	0.361875					0.00200977			207
TLC2_ISKK@21.ais	2944345000	668523	5917148	1424.26	0.00200966	1.47177e-07				0.00200779	1.47039e-07	2.64029	0.0732345	0.361875					0.00200966			208
TLC2_ISKK@22.ais	2934445000	888732	5897175	1656.38	0.00200964	1.2414e-07				0.00200776	1.24024e-07	2.62732	0.061772	0.361875					0.00200964			209
TLC2_ISKK@23.ais	2905764000	2804549	5839836	5742.68	0.00200974	8.85696e-08				0.00200786	8.84869e-08	2.67821	0.0440702	0.361875					0.00200974			210
TLC2_ISKK@24.ais	2971592000	4104838	5972040	8520.21	0.00200971	1.78606e-07				0.00200783	1.78439e-07	2.66224	0.0888717	0.361875					0.00200971			211
TLC2_R33@32.ais	2932974000	3688653	5911749	7373.3	0.00201562	1.43559e-07			1.001						0.00201562			6.54981				212
TLC2_R33@33.ais	2969093000	3202291	5980721	6728.75	0.00201432	1.51787e-07			1.00036						0.00201432			5.90512				213
TLC2_ISKK@25.ais	3003453000	1970770	6035262	3917.92	0.00200944	8.5826e-08				0.0020083	8.57771e-08	2.89473	0.0427114	0.361875					0.00200944			214
TLC2_ISKK@26.ais	2906837000	10084140	5841518	20274.5	0.00200958	1.4639e-07				0.00200843	1.46307e-07	2.9636	0.0728462	0.361875					0.00200958			215
TLC2_R33@34.ais	2936093000	2302077	5914175	4621.91	0.0020143	1.42411e-07			1.00035						0.0020143			5.89313				216
JW530_R33@1.ais	3001523000	857973	6048237	1656.95	0.00201506	1.08442e-07			1.00072						0.00201506			6.27016				217
JW530_R33@2.ais	3016261000	3453831	6077087	6981.4	0.00201477	1.60934e-07			1.00058						0.00201477			6.12984				218
JW530_IXT_20.ais	2998844000	797100	6027799	1687.06	0.00201004	1.2499e-07				0.00200847	1.24892e-07	2.98066	0.0621829	0.284605					0.00201004			219
JW530_IXT_19.ais	2951459000	1904736	5936223	3808.54	0.00201128	1.4539e-07				0.00200971	1.45276e-07	3.6009	0.0722872	0.284605					0.00201128			220
JW530_IXT_17.ais	2964593000	1796769	5961150	3685.96	0.00201078	1.02723e-07				0.00200921	1.02643e-07	3.35041	0.0510863	0.284605					0.00201078			221
JW530_IXT_18.ais	2841162000	2180393	5697217	4597.22	0.00200524	1.54529e-07				0.00200367	1.54408e-07	0.585529	0.0770623	0.284605					0.00200524			222
JW530_IXT_15.ais	2949419000	2820164	5914815	5887.06	0.00200542	1.26604e-07				0.00200385	1.26505e-07	0.672851	0.0631309	0.284605					0.00200542			223
JW530_R33@3.ais	2956516000	998157	5958797	2054.36	0.00201548	8.92678e-08			1.00093						0.00201548			6.4819				224
JW530_R33@4.ais	2898398000	896582	5841415	1843.94	0.00201539	1.01673e-07			1.00089						0.00201539			6.43895				225
JW530_IXT_14.ais	2897498000	2733728	5824580	5704.89	0.00201021	1.37808e-07				0.00200802	1.37658e-07	2.7566	0.0685539	0.284605					0.00201021			226
JW530_IXT_13.ais	2866143000	1182104	5770854	2506.53	0.00201346	1.71768e-07				0.00201126	1.71581e-07	4.3768	0.0853098	0.284605					0.00201346			227
JW530_IXT_12.ais	2877615000	4777090	5782900	9493.94	0.00200962	1.65215e-07				0.00200743	1.65035e-07	2.46079	0.0822122	0.284605					0.00200962			228
JW530_IXH_2.ais	2856710000	2876743	5743377	5878.48	0.00201049	1.42597e-07				0.0020083	1.42441e-07	2.89477	0.0709265	0.284605					0.00201049			229
JW530_IXH_1.ais	2910100000	4021739	5874507	8194.79	0.00201866	1.28257e-07				0.00201646	1.28117e-07	6.97272	0.0635356	0.284605					0.00201866			230
JW530_R33@5.ais	2952898000	1913611	5953471	3845.43	0.00201615	9.30054e-08			1.00126						0.00201615			6.81398				231
JW530_R33@6.ais	2951124000	1068489	5949941	2313.83	0.00201616	1.5853e-07			1.00127						0.00201616			6.82197				232
JW530_IXH_3.ais	2900701000	3733696	5831485	7570.42	0.00201037	1.36468e-07				0.00200753	1.36275e-07	2.51352	0.067882	0.284605					0.00201037			233
JW530_IXH_4.ais	2918838000	1680242	5870224	3507.72	0.00201115	1.32984e-07				0.00200831	1.32796e-07	2.90248	0.0661233	0.284605					0.00201115			234
JW530_IXH_22.ais	2912543000	1361207	5858570	2810.51	0.0020115	1.47593e-07				0.00200866	1.47384e-07	3.07453	0.0733745	0.284605					0.0020115			235
JW530_IXH_5.ais	2904751000	1232447	5842685	2473.72	0.00201142	1.06805e-07				0.00200858	1.06654e-07	3.03862	0.0530992	0.284605					0.00201142			236
JW530_IXH_6.ais	2912668000	3363779	5851820	6682.56	0.00200909	1.53049e-07				0.00200626	1.52833e-07	1.87622	0.0761782	0.284605					0.00200909			237
JW530_R33@7.ais	2940792000	1584255	5928068	3319.02	0.00201581	1.08059e-07			1.0011						0.00201581			6.64469				238
JW530_R33@8.ais	2924863000	1275618	5901417	2567.32	0.00201767	1.9287e-07			1.00202						0.00201767			7.57703				239
JW530_IXH_7.ais	2921489000	5643049	5873837	11382.7	0.00201056	1.41869e-07				0.0020077	1.41668e-07	2.59758	0.0705621	0.284605					0.00201056			240			Used standard bracketing for all unknowns; excluded standards 14-16
JW530_IXH_23.ais	2900099000	1318255	5832672	2833.99	0.0020112	1.1743e-07				0.00200834	1.17263e-07	2.91423	0.0583881	0.284605					0.0020112			241
JW530_IXH_24.ais	2912550000	1995433	5857177	4076.95	0.00201101	9.08548e-08				0.00200815	9.07255e-08	2.82248	0.0451786	0.284605					0.00201101			242
JW530_IXH_8.ais	2893629000	4275725	5817220	8393.41	0.00201036	1.09514e-07				0.0020075	1.09358e-07	2.49485	0.0544748	0.284605					0.00201036			243
JW530_IXH_25.ais	2939125000	2641356	5908570	5232.81	0.00201032	1.21052e-07				0.00200746	1.2088e-07	2.47491	0.0602155	0.284605					0.00201032			244
JW530_R33@9.ais	2908799000	583668	5865434	1222.99	0.00201644	8.72747e-08			1.00141						0.00201644			6.9638				245
JW530_R33@10.ais	2893179000	3133645	5832507	6320.25	0.00201595	1.13794e-07			1.00117						0.00201595			6.7171				246
JW530_IXH_26.ais	2859912000	6737280	5745978	12979.3	0.00200915	2.30986e-07				0.00200666	2.307e-07	2.07497	0.114967	0.284605					0.00200915			247
JW530_IXH_27.ais	2881472000	1429507	5795080	2922.84	0.00201115	1.10958e-07				0.00200866	1.1082e-07	3.07398	0.0551714	0.284605					0.00201115			248
JW530_IXH_10.ais	2894274000	1654868	5821690	3382.18	0.00201145	9.38388e-08				0.00200895	9.37224e-08	3.22311	0.0466523	0.284605					0.00201145			249
JW530_IXH_28.ais	2921766000	2607914	5875354	5460.61	0.00201089	1.42901e-07				0.00200839	1.42724e-07	2.9438	0.0710637	0.284605					0.00201089			250
JW530_IXH_29.ais	2911108000	836106	5853863	1814.23	0.00201087	1.15413e-07				0.00200837	1.1527e-07	2.93383	0.0573945	0.284605					0.00201087			251
JW530_R33@11.ais	2936587000	3994255	5919821	8102.61	0.00201588	1.06189e-07			1.00113						0.00201588			6.68414				252
JW530_R33@12.ais	2971813000	2939349	5991559	5862.35	0.00201613	1.17745e-07			1.00126						0.00201613			6.80599				253
JW530_IXH_30.ais	2916247000	891109	5866167	1873.17	0.00201155	9.17233e-08				0.002009	9.1607e-08	3.2447	0.0455984	0.284605					0.00201155			254
JW530_IXH_31.ais	2902849000	718940	5838277	1521.9	0.00201122	1.5854e-07				0.00200867	1.58339e-07	3.08311	0.0788276	0.284605					0.00201122			255
JW530_IXH_14.ais	2876818000	2235435	5785294	4576.15	0.002011	1.27969e-07				0.00200846	1.27807e-07	2.97388	0.0636346	0.284605					0.002011			256
JW530_IXH_32.ais	2873166000	1204133	5778792	2334.03	0.0020113	1.18971e-07				0.00200875	1.1882e-07	3.12051	0.0591513	0.284605					0.0020113			257
JW530_IXH_33.ais	2859478000	2488841	5750107	5010.25	0.00201089	1.15324e-07				0.00200835	1.15178e-07	2.91902	0.0573497	0.284605					0.00201089			258
JW530_R33@13.ais	2915203000	1611758	5878368	3292.6	0.00201645	1.38235e-07			1.00142						0.00201645			6.96729				259
JW530_R33@14.ais	2901869000	5908637	5856279	12069.1	0.00201811	1.32967e-07									0.00201811							260
JW530_IXH_34.ais	2909172000	784770	5851551	1726.64	0.00201141	1.43684e-07				0.00200892	1.43506e-07	3.20656	0.0714341	0.284605					0.00201141			261
JW530_IXH_16.ais	2878652000	2847809	5788845	5648.29	0.00201096	1.07901e-07				0.00200846	1.07767e-07	2.97813	0.0536565	0.284605					0.00201096			262
JW530_IXH_35.ais	2876723000	579685	5785903	1231.9	0.00201128	1.08837e-07				0.00200879	1.08702e-07	3.14073	0.0541133	0.284605					0.00201128			263
JW530_IXH_37.ais	2880066000	794623	5792602	1561.27	0.00201127	6.74644e-08				0.00200878	6.73808e-08	3.13624	0.0335431	0.284605					0.00201127			264
JW530_IXH_36.ais	3030091000	2913522	6086284	6101.66	0.00200861	1.40067e-07				0.00200612	1.39893e-07	1.80905	0.069733	0.284605					0.00200861			265
JW530_R33@15.ais	2937595000	1818004	5931361	3738.51	0.00201912	1.1514e-07									0.00201912							266
JW530_R33@16.ais	2966183000	4740298	5987007	9484.06	0.00201842	1.09808e-07									0.00201842							267
JW530_IEKG_24.ais	3018359000	822157	6055958	1633.84	0.00200637	1.00684e-07				0.00200389	1.00559e-07	0.69233	0.0501822	0.284605					0.00200637			268
JW530_IEKG_23.ais	3061641000	1924957	6140836	3867.89	0.00200573	1.49493e-07				0.00200325	1.49308e-07	0.372627	0.0745331	0.284605					0.00200573			269
JW530_IEKG_22.ais	3011284000	3637891	6039536	7058.34	0.00200564	1.32696e-07				0.00200315	1.32532e-07	0.324248	0.0661617	0.284605					0.00200564			270
JW530_IEKG_20.ais	3035540000	3624636	6089277	7493.69	0.00200599	1.24515e-07				0.00200351	1.24361e-07	0.502803	0.0620715	0.284605					0.00200599			271
JW530_IEKG_19.ais	3022446000	1502123	6065599	2997	0.00200685	6.61968e-08				0.00200436	6.61147e-08	0.930237	0.0329854	0.284605					0.00200685			272
JW530_R33@17.ais	3014486000	2536888	6076602	5207.02	0.0020158	9.8395e-08			1.00109						0.0020158			6.6417				273
JW530_R33@18.ais	3016165000	1037010	6080731	2112.66	0.00201605	1.08236e-07			1.00122						0.00201605			6.76504				274
JW530_IEKG_21.ais	3042395000	2887142	6105493	5900.66	0.0020068	1.30336e-07				0.00200436	1.30178e-07	0.931081	0.0649472	0.284605					0.0020068			275
JW530_IEKG_18.ais	3084633000	3257494	6192838	6647.69	0.00200764	1.07351e-07				0.0020052	1.07221e-07	1.34905	0.0534712	0.284605					0.00200764			276
JW530_IEKG_16.ais	3098729000	3635044	6217642	7108.78	0.00200651	1.3934e-07				0.00200407	1.39171e-07	0.786438	0.0694439	0.284605					0.00200651			277
JW530_IEKG_15.ais	3157692000	4729091	6334146	9204.44	0.00200594	1.26869e-07				0.0020035	1.26714e-07	0.501642	0.0632464	0.284605					0.00200594			278
JW530_IEKG_14.ais	3182339000	878159	6383093	1824.73	0.00200579	1.30362e-07				0.00200335	1.30204e-07	0.423834	0.0649931	0.284605					0.00200579			279
JW530_R33@19.ais	3098965000	3389512	6247338	6808.04	0.00201594	1.01511e-07			1.00116						0.00201594			6.71311				280
JW530_R33@20.ais	3090457000	806729	6231638	1732.57	0.00201641	1.25584e-07			1.0014						0.00201641			6.94782				281
JW530_IEKG_13.ais	3109877000	2782157	6236975	5474.6	0.00200554	1.61902e-07				0.00200301	1.61697e-07	0.253375	0.0807272	0.284605					0.00200554			282
JW530_IEKG_12.ais	3068550000	1550006	6158455	3193.99	0.00200696	6.718e-08				0.00200443	6.70952e-08	0.962591	0.0334735	0.284605					0.00200696			283
JW530_IEKG_11.ais	3059469000	1274037	6136748	2372.59	0.00200582	1.41874e-07				0.00200329	1.41695e-07	0.39452	0.070731	0.284605					0.00200582			284
JW530_IIM_2.ais	2923345000	1713250	5881237	3506.96	0.00201182	6.78356e-08				0.00200928	6.775e-08	3.385	0.0337186	0.284605					0.00201182			285
JW530_R33@21.ais	2979317000	1044894	6006660	2196	0.00201612	1.02498e-07			1.00125						0.00201612			6.8015				286
JW530_R33@22.ais	3004997000	3211192	6058373	6289.76	0.0020161	1.11537e-07			1.00124						0.0020161			6.79151				287
JW530_IIM_4.ais	2906228000	2210241	5846669	4358.97	0.00201177	1.2673e-07				0.00200916	1.26565e-07	3.3266	0.0629941	0.284605					0.00201177			288
JW530_IIM_3.ais	2926511000	2065859	5885459	4114.5	0.00201108	1.44715e-07				0.00200847	1.44527e-07	2.98348	0.0719587	0.284605					0.00201108			289
JW530_IIM_5.ais	2928752000	849279	5891941	2013.38	0.00201176	1.81608e-07				0.00200915	1.81372e-07	3.31962	0.0902733	0.284605					0.00201176			290
JW530_IIM_6.ais	2958626000	1407248	5953502	2941.87	0.00201225	9.04446e-08				0.00200964	9.03272e-08	3.56599	0.044947	0.284605					0.00201225			291
JW530_R33@23.ais	3090288000	2846342	6230575	5666.37	0.00201618	1.29454e-07			1.00128						0.00201618			6.83146				292
JW530_R33@24.ais	3121116000	3241263	6293622	6650.05	0.00201646	1.11971e-07			1.00142						0.00201646			6.97378				293
JW530_IIM_9.ais	3078962000	3794483	6194324	7466.56	0.00201182	1.30854e-07				0.00200905	1.30673e-07	3.27192	0.0650423	0.284605					0.00201182			294
JW530_IIM_10.ais	3129535000	4243552	6296760	8645.16	0.00201204	1.06071e-07				0.00200927	1.05925e-07	3.38113	0.0527182	0.284605					0.00201204			295
JW530_IIM_11.ais	3130240000	2436676	6298649	5037.12	0.00201219	1.2349e-07				0.00200942	1.2332e-07	3.45644	0.0613708	0.284605					0.00201219			296
JW530_R33@25.ais	3262247000	3850586	6578302	7830.72	0.00201649	8.70793e-08			1.00144						0.00201649			6.98826				297
JW530_R33@26.ais	3297017000	2149743	6648007	4493.72	0.00201637	1.09017e-07			1.00138						0.00201637			6.92634				298
TLC3_R33@2.ais	3637556000	1295596	7324469	2873.95	0.00201357	1.27198e-07			0.999985						0.00201357			5.52759				299
TLC3_R33@3.ais	3613832000	1724264	7274738	3523.95	0.00201303	8.88805e-08			0.999715						0.00201303			5.25643				300
TLC3_ISS@1.ais	3282730000	2538442	6604190	5066.19	0.0020118	9.74745e-08				0.00201157	9.74632e-08	4.52721	0.0484514	335.277		335.326		-1000	0.0020118			301
TLC3_ISS@2.ais	3619771000	1188048	7269804	2473.55	0.00200836	1.15235e-07				0.00200813	1.15222e-07	2.81055	0.0573779	0.36959		0.426968			0.00200836			302
TLC3_ISS@3.ais	3592568000	1455213	7216769	2980.12	0.0020088	5.61661e-08				0.00200857	5.61596e-08	3.03275	0.02796	0.36959		0.39755			0.0020088			303
TLC3_ISS@4.ais	3560472000	2996552	7153124	6173.45	0.00200904	1.0671e-07				0.00200881	1.06698e-07	3.14909	0.0531152	0.36959		0.422706			0.00200904			304
TLC3_ISS@5.ais	3217558000	3197686	6513470	6656.55	0.00202435	1.02297e-07				0.00202412	1.02285e-07	10.7956	0.0505332	0.36959		0.420124			0.00202435			305
TLC3_R33@4.ais	3559670000	642670	7168091	1303.33	0.00201369	1.16556e-07			1.00005						0.00201369	0		5.59051				306
TLC3_R33@5.ais	3579326000	2240523	7212486	4577.55	0.00201504	1.21452e-07			1.00072						0.00201504	0		6.26217				307
TLC3_ISS@6.ais	3546174000	1935056	7125771	3905.95	0.00200943	1.06137e-07				0.00200852	1.06089e-07	3.00464	0.0528196	0.36959		0.42241			0.00200943			308
TLC3_ISS@7.ais	3562520000	1865722	7157996	3919.36	0.00200925	1.28201e-07				0.00200834	1.28143e-07	2.91729	0.0638053	0.36959		0.433396			0.00200925			309
TLC3_ISS@8.ais	3238393000	2062426	6505047	4121.52	0.00200873	1.08849e-07				0.00200782	1.088e-07	2.65624	0.054188	0.36959		0.423778			0.00200873			310
TLC3_ISS@9.ais	3565489000	1518500	7164726	3232.58	0.00200947	1.14391e-07				0.00200856	1.14339e-07	3.02461	0.0569261	0.36959		0.426517			0.00200947			311
TLC3_ISS@10.ais	3571449000	1944092	7176710	3937.68	0.00200947	5.79152e-08				0.00200856	5.78891e-08	3.02561	0.0288212	0.36959		0.398412			0.00200947			312
TLC3_R33@6.ais	3603848000	3927346	7262444	7954.19	0.00201519	9.06387e-08			1.00079						0.00201519	0		6.33808				313
TLC3_R33@7.ais	3640229000	1789350	7331839	3556.22	0.00201411	1.14522e-07			1.00026						0.00201411	0		5.80025				314
TLC3_ISS@11.ais	3619815000	2313312	7274263	4789.72	0.00200957	9.22467e-08				0.00200865	9.22044e-08	3.0688	0.0459038	0.36959		0.415494			0.00200957			315
TLC3_ISS@12.ais	3633708000	2609572	7303216	5259.09	0.00200985	1.02263e-07				0.00200893	1.02216e-07	3.21106	0.0508808	0.36959		0.420471			0.00200985			316
TLC3_ISS@13.ais	3656768000	3198525	7348519	6549.85	0.00200957	8.43528e-08				0.00200864	8.43141e-08	3.0683	0.0419756	0.36959		0.411566			0.00200957			317
TLC3_ISS@14.ais	3631329000	1151487	7297260	2262.77	0.00200953	8.59537e-08				0.00200861	8.59142e-08	3.04983	0.042773	0.36959		0.412364			0.00200953			318
TLC3_ISS@15.ais	3250413000	3864946	6582297	7988.24	0.00202506	1.10443e-07				0.00202414	1.10392e-07	10.8041	0.0545381	0.36959		0.424129			0.00202506			319			Used standard bracketing for all unknowns
TLC3_R33@8.ais	3669143000	3446943	7391583	7092.85	0.00201453	1.19372e-07			1.00046						0.00201453			6.00499				320
TLC3_R33@9.ais	3709565000	2394369	7472043	4960.48	0.00201426	9.04132e-08			1.00033						0.00201426			5.87466				321
R33@1.ais	2623797000	1680408	5275161	3340.67	0.00201051	1.16547e-07									0.00201051							323
R33@2.ais	2608397000	3624972	5244959	7525.28	0.0020108	1.34036e-07									0.0020108							324
R33@3.ais	2665168000	4047485	5359182	8352.64	0.00201082	1.42989e-07									0.00201082							325
R33@4.ais	2659933000	2853259	5349108	5912.99	0.00201099	1.20523e-07									0.00201099							326
R33@5.ais	2700799000	2933819	5430435	5881.14	0.00201068	1.15349e-07									0.00201068							327
TLC1_R33@6.ais	2924068000	4838414	5884097	9580.54	0.0020123	1.06807e-07			0.999354						0.0020123			4.89338				328
TLC1_R33@7.ais	2807992000	4260387	5654061	8528.89	0.00201356	1.14184e-07			0.99998						0.00201356			5.5231				329
TLC1_IISK@1.ais	2724669000	909051	5486194	1931.34	0.00201353	1.19241e-07				0.00201441	1.19293e-07	5.94987	0.0592198	0.752914					0.00201353			330
TLC1_IISK@2.ais	2626333000	2000887	5258769	4004.56	0.00200232	1.41984e-07				0.00200321	1.42046e-07	0.352894	0.0709095	0.752914					0.00200232			331
TLC1_IISK@3.ais	2568528000	715320	5138167	1416.94	0.00200043	1.32163e-07				0.00200131	1.32221e-07	-0.591842	0.0660671	0.752914					0.00200043			332
TLC1_IISK@4.ais	2533104000	1526827	5067286	3000.97	0.00200043	1.14231e-07				0.00200131	1.14281e-07	-0.595339	0.0571031	0.752914					0.00200043			333
TLC1_IISK@5.ais	2491557000	769064	4981273	1363.34	0.00199926	1.51387e-07				0.00200014	1.51454e-07	-1.17687	0.0757217	0.752914					0.00199926			334
TLC1_R33@8.ais	2483488000	1235968	5000224	2629.74	0.00201339	1.22667e-07			0.999894						0.00201339			5.4367				335
TLC1_R33@9.ais	2444054000	965734	4916471	1986.9	0.00201161	1.34913e-07			0.999009						0.00201161			4.54682				336
TLC1_IISK@6.ais	2420244000	973949	4841812	1963.46	0.00200055	1.61878e-07				0.00200018	1.61849e-07	-1.15621	0.0809168	0.752914					0.00200055			337
TLC1_IISK@7.ais	100297700	260020	197389	538.028	0.00196804	2.23079e-06				0.00196768	2.23038e-06	-17.3865	1.13351	0.752914					0.00196804			338
TLC1_IISK@8.ais	2386776000	1203569	4774172	2498.4	0.00200026	1.38854e-07				0.0019999	1.38829e-07	-1.29951	0.0694179	0.752914					0.00200026			339
TLC1_IISK_8.ais	2386915000	1824123	4783906	3907.91	0.00200422	1.96195e-07				0.00200386	1.96159e-07	0.67816	0.0978908	0.752914					0.00200422			340
TLC1_IISK_10.ais	2374686000	1259640	4778693	2464.78	0.00201235	1.406e-07				0.00201198	1.40575e-07	4.73585	0.0698688	0.752914					0.00201235			341
TLC1_R33@10.ais	2385713000	1252190	4808297	2543.72	0.00201546	1.38798e-07			1.00092						0.00201546			6.46941				342
TLC1_R33@11.ais	2372407000	1497058	4781377	3056.81	0.00201541	1.27207e-07			1.0009						0.00201541			6.44794				343			Used standard bracketing for all unknowns; excluded first 5 stds; break between samples
TLC1_IISK_9.ais	2387270000	606651	4773966	1257.78	0.00199976	1.17653e-07				0.00199791	1.17544e-07	-2.29385	0.0588335	0.752914					0.00199976			344
TLC1_IISK@11.ais	2383643000	2430782	4773687	4913.89	0.00200269	1.35912e-07				0.00200083	1.35787e-07	-0.834034	0.0678651	0.752914					0.00200269			345
TLC1_IISK@12.ais	2372024000	2993008	4748347	5799.02	0.00200181	1.7212e-07				0.00199996	1.71961e-07	-1.26909	0.0859821	0.752914					0.00200181			346
TLC1_IISK@13.ais	2330145000	2323121	4663386	4721.43	0.00200133	1.28963e-07				0.00199947	1.28844e-07	-1.51106	0.0644389	0.752914					0.00200133			347
TLC1_IISK@14.ais	2409447000	3400562	4830572	6644.08	0.00200485	1.21995e-07				0.00200299	1.21882e-07	0.244616	0.0608501	0.752914					0.00200485			348
TLC1_R33@6`12.ais	2470809000	2791592	4980003	5477.17	0.00201554	1.44156e-07			1.00096						0.00201554			6.51036				349
TLC1_IISK@16.ais	2512215000	664933	5033946	1510.72	0.00200379	2.02492e-07				0.00200344	2.02458e-07	0.471115	0.101055	0.752914					0.00200379			350
TLC1_IISK@17.ais	2531636000	2111691	5064871	4323.14	0.00200063	1.12426e-07				0.00200029	1.12407e-07	-1.10464	0.0561953	0.752914					0.00200063			351
TLC1_IISK@18.ais	2509207000	2466072	5019774	4896.13	0.00200054	4.84141e-08				0.0020002	4.84057e-08	-1.14908	0.0242005	0.752914					0.00200054			352
TLC1_IISK@19.ais	2552010000	3336922	5103000	6635.41	0.0019996	2.04686e-07				0.00199926	2.04651e-07	-1.61941	0.102364	0.752914					0.0019996			353
TLC1_R33@14.ais	2582547000	2948834	5196652	6129.47	0.00201222	1.56975e-07			0.999314						0.00201222			4.85343				354
TLC1_R33@15.ais	2628997000	3663801	5295010	7388.19	0.00201408	9.29512e-08			1.00024						0.00201408			5.78277				355
TLC1_IISK@20.ais	2661486000	3920080	5326048	7815.33	0.00200116	8.52605e-08				0.0020016	8.52795e-08	-0.447533	0.0426056	0.752914					0.00200116			356
TLC1_IISK@21.ais	2697069000	5086188	5399066	10178.2	0.00200183	1.51168e-07				0.00200227	1.51202e-07	-0.112376	0.0755149	0.752914					0.00200183			357
TLC1_IISK@22.ais	2830125000	8641676	5659284	17057.5	0.00199966	1.52473e-07				0.00200011	1.52507e-07	-1.19427	0.0762492	0.752914					0.00199966			358
TLC1_IISK@23.ais	2992213000	9185928	5997556	18456.6	0.00200439	1.16428e-07				0.00200484	1.16454e-07	1.16681	0.0580863	0.752914					0.00200439			359
TLC1_IISK@24.ais	3138399000	12941070	6278500	25834.6	0.00200054	9.29204e-08				0.00200099	9.29412e-08	-0.753718	0.0464476	0.752914					0.00200054			360
TLC1_IISK@25.ais	3364073000	7975326	6727589	16069.6	0.00199983	8.30457e-08				0.00200028	8.30643e-08	-1.10786	0.0415263	0.752914					0.00199983			361
TLC1_IISK@26.ais	3311724000	3204070	6625918	6608.3	0.00200074	1.32195e-07				0.00200119	1.32224e-07	-0.652822	0.0660728	0.752914					0.00200074			362
TLC1_IEFS@1.ais	2420587000	1337235	4859876	2911.26	0.00200773	1.84965e-07				0.00200929	1.85109e-07	3.39183	0.0921266	0.21468					0.00200773			363
TLC1_IEFS@2.ais	2367990000	2588517	4753436	5289.82	0.00200737	1.73617e-07				0.00200894	1.73753e-07	3.21441	0.0864898	0.21468					0.00200737			364
TLC1_IEFS@3.ais	2348555000	650822	4715605	1389.83	0.00200788	1.26762e-07				0.00200944	1.26861e-07	3.4663	0.0631325	0.21468					0.00200788			365
TLC1_IEFS@4.ais	2324546000	750928	4687364	1598.43	0.00201646	8.02195e-08				0.00201804	8.02821e-08	7.75878	0.0397823	0.21468					0.00201646			366
TLC1_IEFS@5.ais	2309119000	1406761	4635207	3028.65	0.00200735	1.72465e-07				0.00200891	1.726e-07	3.20292	0.0859171	0.21468					0.00200735			367
TLC1_R33@16.ais	2306984000	801622	4641741	1467	0.00201204	1.955e-07			0.999225						0.00201204			4.76355				368
TLC1_R33@17.ais	2307162000	1441980	4642061	3034.12	0.00201202	1.67036e-07			0.999216						0.00201202			4.75506				369
TLC1_IEFS@6.ais	2288975000	1203241	4594673	2282.91	0.00200731	1.69909e-07				0.00200867	1.70025e-07	3.08247	0.0846455	0.21468					0.00200731			370
TLC1_IEFS@7.ais	2243493000	1260775	4504087	2513.88	0.00200762	1.14209e-07				0.00200899	1.14286e-07	3.24088	0.0568875	0.21468					0.00200762			371
TLC1_IEFS@10.ais	2174496000	2516872	4365008	5036.19	0.00200737	1.42413e-07				0.00200873	1.4251e-07	3.11195	0.0709452	0.21468					0.00200737			372
TLC1_IEFS@11.ais	2244137000	813783	4506399	1862.5	0.00200808	1.91064e-07				0.00200944	1.91194e-07	3.46775	0.0951476	0.21468					0.00200808			373
TLC1_IEFS@9.ais	2225072000	914575	4466979	1782.45	0.00200757	1.35037e-07				0.00200893	1.35129e-07	3.2124	0.0672639	0.21468					0.00200757			374
TLC1_R33@18.ais	2247736000	1707269	4523162	3357.38	0.00201232	1.01791e-07			0.999364						0.00201232			4.90387				375
TLC1_R33@19.ais	2251321000	2161816	4530873	4434.33	0.00201254	1.75627e-07			0.999473						0.00201254			5.01323				376
TLC1_IEFS@12.ais	2221778000	1716255	4459382	3563.93	0.00200712	1.23227e-07				0.00200832	1.233e-07	2.90642	0.0613948	0.21468					0.00200712			377
TLC1_IEFS@13.ais	2198763000	1377704	4416164	2687.15	0.00200848	1.89114e-07				0.00200967	1.89227e-07	3.58298	0.0941578	0.21468					0.00200848			378
TLC1_IEFS@14.ais	2215631000	1610079	4447904	3367.41	0.00200751	2.23791e-07				0.00200871	2.23925e-07	3.10029	0.111477	0.21468					0.00200751			379
TLC1_IEFS@15.ais	2230248000	1611933	4477363	3223.51	0.00200756	1.93601e-07				0.00200876	1.93716e-07	3.12627	0.0964358	0.21468					0.00200756			380
TLC1_IEFS@16.ais	1494357000	3978350	2996518	8011.91	0.00200522	1.44334e-07				0.00200642	1.4442e-07	1.95604	0.0719792	0.21468					0.00200522			381
TLC1_R33@20.ais	2216896000	1668095	4461292	3584.39	0.0020124	2.00155e-07			0.999406						0.0020124			4.94582				382
TLC1_R33@21.ais	2203209000	949787	4433598	2024.99	0.00201234	1.51713e-07			0.999372						0.00201234			4.91186				383
TLC1_IEFS@17.ais	2198976000	1036600	4415204	2131.36	0.00200784	1.59141e-07				0.00200879	1.59216e-07	3.14157	0.0792594	0.21468					0.00200784			384
TLC1_IEFS@18.ais	2218758000	745609	4455429	1710.84	0.00200807	1.74966e-07				0.00200902	1.75048e-07	3.25598	0.0871313	0.21468					0.00200807			385
TLC1_IEFS_26.ais	2208593000	903645	4434568	1803.47	0.00200787	1.29395e-07				0.00200882	1.29456e-07	3.15406	0.0644439	0.21468					0.00200787			386
TLC1_IEFS_19.ais	2186921000	1625058	4390741	3212.3	0.00200773	1.8139e-07				0.00200867	1.81475e-07	3.08311	0.0903458	0.21468					0.00200773			387
TLC1_IEFS_20.ais	2187032000	761098	4390989	1463.59	0.00200774	1.44699e-07				0.00200868	1.44767e-07	3.08861	0.0720704	0.21468					0.00200774			388
TLC1_R33@22.ais	2216756000	1319419	4461344	2774.21	0.00201256	1.55474e-07			0.999481						0.00201256			5.02122				389
TLC1_R33@23.ais	2180378000	2340046	4389781	4782.54	0.00201331	1.03214e-07			0.999857						0.00201331			5.39925				390
TLC1_IEFS@21.ais	2139494000	3919144	4295201	7871.83	0.00200758	1.31027e-07				0.00200822	1.31069e-07	2.85707	0.0652662	0.21468					0.00200758			391
TLC1_IEFS@22.ais	2279618000	2701033	4577156	5291.84	0.00200786	1.43695e-07				0.00200851	1.43741e-07	2.99894	0.0715663	0.21468					0.00200786			392
TLC1_IEFS@23.ais	2224068000	3965671	4465245	8160.75	0.00200769	1.42029e-07				0.00200833	1.42074e-07	2.91351	0.0707423	0.21468					0.00200769			393
TLC1_IEFS@24.ais	2290166000	1945673	4596841	4034.74	0.00200721	1.72798e-07				0.00200785	1.72853e-07	2.67224	0.0860885	0.21468					0.00200721			394
TLC1_IEFS@25.ais	2343442000	3500402	4704251	6844.94	0.00200741	1.46069e-07				0.00200806	1.46116e-07	2.77414	0.0727648	0.21468					0.00200741			395
TLC1_R33@24.ais	2284228000	1670621	4597708	3566.51	0.0020128	1.20394e-07			0.999605						0.0020128			5.14607				396
TLC1_R33@25.ais	2292608000	1527011	4615358	3120.05	0.00201315	9.49929e-08			0.999776						0.00201315			5.31735				397
								Alpha	#REF!

## Sheet: Gurenko et al 2015 O
Sample	Spot position	N	d18O	1 sigma error		Note
130-02-zrn0c	core	2	3.93	0.13		Gurenko et a 2015.
130-02-zrn1r	rim	2	3.42	0.13		Gurenko et a 2015.
130-02-zrn2r	rim	1	4.44	0.12		Gurenko et a 2015.
130-02-zrn2c	core	1	3.7	0.12		Gurenko et a 2015.
130-02-zrn2m	mantle	1	3.28	0.13		Gurenko et a 2015.
130-02-zrn3m	mantle	2	2.97	0.13		Gurenko et a 2015.
130-02-zrn3c	core	1	3.9	0.13		Gurenko et a 2015.
130-02-zrn4c	core	2	2.96	0.15		Gurenko et a 2015.
130-02-zrn4m	mantle	1	4.44	0.09		Gurenko et a 2015.
130-02-zrn4r	rim	1	5.2	0.1		Gurenko et a 2015.
130-02-zrn5r	rim	2	4.53	0.12		Gurenko et a 2015.
130-02-zrn5m	mantle	1	3.99	0.12		Gurenko et a 2015.
130-02-zrn6c	core	2	3.18	0.12		Gurenko et a 2015.
130-02-zrn7m	mantle	1	3.51	0.12		Gurenko et a 2015.
130-02-zrn7c	core	1	2.99	0.12		Gurenko et a 2015.
130-02-zrn8c	core	1	2.44	0.09		Gurenko et a 2015.
130-02-zrn8m	mantle	1	4.95	0.1		Gurenko et a 2015.
130-02-zrn8r	rim	1	6.26	0.1		Gurenko et a 2015.
130-02-zrn9c	core	1	4.03	0.11		Gurenko et a 2015.
130-02-zrn13c	core	2	4.51	0.1		Gurenko et a 2015.
130-02-zrn13m	mantle	1	5.12	0.15		Gurenko et a 2015.
130-02-zrn13r	rim	1	5.37	0.1		Gurenko et a 2015.
130-02-zrn27c	core	1	4.01	0.11		Gurenko et a 2015.
130-02-zrn27m	mantle	1	4.74	0.1		Gurenko et a 2015.
130-02-zrn30c	core	1	4.59	0.12		Gurenko et a 2015.
130-02-zrn30r	rim	1	5.48	0.1		Gurenko et a 2015.
130-02-zrn32m	mantle	1	3.38	0.1		Gurenko et a 2015.
130-02-zrn33m	mantle	1	3.48	0.1		Gurenko et a 2015.
130-02-zrn33r	rim	1	4.48	0.09		Gurenko et a 2015.
130-02-zrn34c	core	1	4.32	0.11		Gurenko et a 2015.
130-02-zrn34r	rim	1	5.45	0.1		Gurenko et a 2015.
130-02-zrn36c	core	1	2.92	0.1		Gurenko et a 2015.
130-02-zrn36m	mantle	2	3.99	0.1		Gurenko et a 2015.
130-02-zrn36r	rim	1	6.14	0.11		Gurenko et a 2015.
130-15-zrn1c	core	1	2.56	0.13		Gurenko et a 2015.
130-15-zrn1m	mantle	1	4.23	0.16		Gurenko et a 2015.
130-15-zrn2c	core	2	3.92	0.11		Gurenko et a 2015.
130-15-zrn4c	core	1	3.79	0.11		Gurenko et a 2015.
130-15-zrn4r	rim	1	5.24	0.11		Gurenko et a 2015.
130-15-zrn5c	core	2	4.12	0.1		Gurenko et a 2015.
130-15-zrn6r	rim	1	4.58	0.14		Gurenko et a 2015.
130-15-zrn6-1c	core	1	3.73	0.13		Gurenko et a 2015.
130-15-zrn6-2c	core	1	2.8	0.15		Gurenko et a 2015.
130-15-zrn7m	mantle	2	3.22	0.14		Gurenko et a 2015.
130-15-zrn8m	mantle	1	3.85	0.14		Gurenko et a 2015.
130-15-zrn8-1c	core	1	3.33	0.15		Gurenko et a 2015.
130-15-zrn8-2c	core	1	3.78	0.1		Gurenko et a 2015.
130-15-zrn8r	rim	1	3.7	0.1		Gurenko et a 2015.
130-15-zrn9m	mantle	2	3.88	0.14		Gurenko et a 2015.
130-15-zrn9-2m	mantle	1	3.1	0.13		Gurenko et a 2015.
130-15-zrn10m	mantle	2	3.23	0.14		Gurenko et a 2015.
130-15-zrn11r	rim	1	4	0.14		Gurenko et a 2015.
130-15-zrn11r	mantle	1	3.28	0.13		Gurenko et a 2015.
130-15-zrn12m	mantle	2	2.77	0.13		Gurenko et a 2015.
130-15-zrn28r	rim	1	5.67	0.1		Gurenko et a 2015.
130-15-zrn29m	mantle	1	4.41	0.1		Gurenko et a 2015.
130-15-zrn32m	mantle	2	3.57	0.13		Gurenko et a 2015.
130-15-zrn34r	rim	1	4.19	0.13		Gurenko et a 2015.
130-15-zrn34m	mantle	1	3.62	0.12		Gurenko et a 2015.
130-15-zrn36c	core	2	3.46	0.13		Gurenko et a 2015.
130-15-zrn38c	core	2	3.8	0.14		Gurenko et a 2015.
130-17-zrn1m	mantle	1	2.75	0.11		Gurenko et a 2015.
130-17-zrn2c	core	2	3.73	0.12		Gurenko et a 2015.
130-17-zrn3m	mantle	2	4.73	0.12		Gurenko et a 2015.
130-17-zrn4m	mantle	1	4.3	0.12		Gurenko et a 2015.
130-17-zrn4c	core	1	3.38	0.12		Gurenko et a 2015.
130-17-zrn5c	core	1	3.05	0.13		Gurenko et a 2015.
130-17-zrn5-1m	mantle	1	3.46	0.13		Gurenko et a 2015.
130-17-zrn5-2m	mantle	1	4.2	0.12		Gurenko et a 2015.
130-17-zrn6c	core	2	4.64	0.13		Gurenko et a 2015.
130-17-zrn7m	mantle	1	5.47	0.12		Gurenko et a 2015.
130-17-zrn7c	core	2	4.26	0.12		Gurenko et a 2015.
130-17-zrn9-1c	core	1	3.99	0.13		Gurenko et a 2015.
130-17-zrn9-2c	core	1	4.23	0.11		Gurenko et a 2015.
130-17-zrn9m	mantle	1	4.52	0.12		Gurenko et a 2015.
130-17-zrn9r	rim	1	4.9	0.09		Gurenko et a 2015.
130-17-zrn14c	core	1	5.58	0.12		Gurenko et a 2015.
130-17-zrn14m	mantle	1	3.52	0.1		Gurenko et a 2015.
130-17-zrn14r	rim	1	4.98	0.09		Gurenko et a 2015.
130-17-zrn17c	core	1	4.59	0.11		Gurenko et a 2015.
130-17-zrn17r	rim	1	5.58	0.11		Gurenko et a 2015.
130-17-zrn18c	core	1	4.67	0.11		Gurenko et a 2015.
130-17-zrn18r	rim	1	4.29	0.1		Gurenko et a 2015.
130-17-zrn20m	mantle	1	4.22	0.11		Gurenko et a 2015.
130-17-zrn20r	rim	1	4.85	0.1		Gurenko et a 2015.
130-14-zrn1c	core	2	3.81	0.14		Gurenko et a 2015.
130-14-zrn1m	mantle	1	5.18	0.14		Gurenko et a 2015.
130-14-zrn1r	rim	1	5.87	0.13		Gurenko et a 2015.
130-14-zrn2m	mantle	2	3.47	0.13		Gurenko et a 2015.
130-14-zrn3-1m	mantle	1	3.74	0.14		Gurenko et a 2015.
130-14-zrn3-2m	mantle	1	3.36	0.14		Gurenko et a 2015.
130-14-zrn4r	rim	1	4.23	0.15		Gurenko et a 2015.
130-14-zrn4m	mantle	1	3.82	0.12		Gurenko et a 2015.
130-14-zrn6m	mantle	2	3.36	0.14		Gurenko et a 2015.
130-14-zrn7c	core	2	3.5	0.14		Gurenko et a 2015.
130-14-zrn7m	mantle	2	4.69	0.13		Gurenko et a 2015.
130-14-zrn8c	core	2	3.93	0.18		Gurenko et a 2015.
130-14-zrn9c	core	1	4.56	0.15		Gurenko et a 2015.
130-14-zrn10c	core	1	2.84	0.15		Gurenko et a 2015.
130-14-zrn10r	rim	1	3.64	0.13		Gurenko et a 2015.
130-14-zrn22c	core	2	3.27	0.14		Gurenko et a 2015.
130-14-zrn22m	mantle	1	4.03	0.13		Gurenko et a 2015.
130-14-zrn23c	core	2	4.19	0.13		Gurenko et a 2015.
130-14-zrn26c	core	1	3.9	0.13		Gurenko et a 2015.
130-14-zrn26m	mantle	1	4.78	0.13		Gurenko et a 2015.
130-14-zrn28c	core	1	3.87	0.14		Gurenko et a 2015.
130-14-zrn28m	mantle	1	4.93	0.13		Gurenko et a 2015.
130-14-zrn30c	core	2	4.83	0.16		Gurenko et a 2015.
130-14-zrn31c	core	1	5.33	0.13		Gurenko et a 2015.
130-14-zrn31r	rim	1	4.27	0.13		Gurenko et a 2015.
130-18-zrn1r	rim	2	5.63	0.13		Gurenko et a 2015.
130-18-zrn1m	mantle	2	5.29	0.11		Gurenko et a 2015.
130-18-zrn2c	core	1	4.53	0.1		Gurenko et a 2015.
130-18-zrn2-1r	rim	2	5.6	0.1		Gurenko et a 2015.
130-18-zrn2-2r	rim	1	5.32	0.12		Gurenko et a 2015.
130-18-zrn2m	mantle	1	4.94	0.13		Gurenko et a 2015.
130-18-zrn3r	rim	1	5.44	0.13		Gurenko et a 2015.
130-18-zrn3-1m	mantle	1	4.92	0.13		Gurenko et a 2015.
130-18-zrn3-2m	mantle	1	4.74	0.13		Gurenko et a 2015.
130-18-zrn3c	core	1	3.81	0.12		Gurenko et a 2015.
130-18-zrn4m	mantle	1	5.14	0.13		Gurenko et a 2015.
130-18-zrn4c	core	2	3.21	0.18		Gurenko et a 2015.
130-18-zrn5c	core	3	4.17	0.12		Gurenko et a 2015.
130-18-zrn6m	mantle	1	4.02	0.14		Gurenko et a 2015.
130-18-zrn6c	core	1	3.54	0.12		Gurenko et a 2015.
130-18-zrn7r	rim	1	4.59	0.13		Gurenko et a 2015.
130-18-zrn7c	core	1	3.78	0.12		Gurenko et a 2015.
130-18-zrn8-1m	mantle	1	4.34	0.12		Gurenko et a 2015.
130-18-zrn8-2m	mantle	1	3.96	0.13		Gurenko et a 2015.
130-18-zrn9c	core	2	3.72	0.12		Gurenko et a 2015.
130-18-zrn10c	core	1	3.65	0.14		Gurenko et a 2015.
130-18-zrn10m	mantle	1	5.13	0.12		Gurenko et a 2015.
130-18-zrn10r	rim	1	4.72	0.12		Gurenko et a 2015.
130-18-zrn12c	core	1	4.06	0.12		Gurenko et a 2015.
130-18-zrn12r	rim	1	5.35	0.11		Gurenko et a 2015.
130-18-zrn17c	core	1	3.84	0.11		Gurenko et a 2015.
130-18-zrn17r	rim	1	4.65	0.12		Gurenko et a 2015.
130-18-zrn18c	core	1	3.38	0.09		Gurenko et a 2015.
130-18-zrn18r	rim	1	4.68	0.1		Gurenko et a 2015.
130-18-zrn19c	core	1	3.65	0.1		Gurenko et a 2015.
130-18-zrn19r	rim	1	5.99	0.11		Gurenko et a 2015.
130-18-zrn20c	core	1	3.8	0.09		Gurenko et a 2015.
130-18-zrn20r	rim	1	3.93	0.1		Gurenko et a 2015.
130-18-zrn30r	rim	1	4.35	0.11		Gurenko et a 2015.
130-19-zrn1-1m	mantle	1	4.4	0.16		Gurenko et a 2015.
130-19-zrn1-1m	mantle	1	4.03	0.16		Gurenko et a 2015.
130-19-zrn4-1c	core	2	4	0.16		Gurenko et a 2015.
130-19-zrn4-2c	core	2	4.74	0.11		Gurenko et a 2015.
130-19-zrn7-1m	mantle	2	4.35	0.15		Gurenko et a 2015.
130-19-zrn7-2m	mantle	1	3.95	0.12		Gurenko et a 2015.
130-19-zrn7r	rim	1	4.02	0.09		Gurenko et a 2015.
130-19-zrn8m	mantle	2	4.37	0.15		Gurenko et a 2015.
130-19-zrn8c	core	1	3.23	0.16		Gurenko et a 2015.
130-19-zrn11r	rim	1	5.29	0.16		Gurenko et a 2015.
130-19-zrn11c	core	1	3.42	0.16		Gurenko et a 2015.
130-19-zrn12c	core	2	4.44	0.13		Gurenko et a 2015.
130-19-zrn12m	mantle	1	3.73	0.12		Gurenko et a 2015.
130-19-zrn12r	rim	1	3.81	0.12		Gurenko et a 2015.
130-19-zrn14c	core	2	4.97	0.12		Gurenko et a 2015.
130-19-zrn14m	mantle	1	4.11	0.11		Gurenko et a 2015.
130-19-zrn14r	rim	1	5.81	0.11		Gurenko et a 2015.
130-19-zrn17m	mantle	1	4.61	0.1		Gurenko et a 2015.
130-19-zrn20m	mantle	1	3.72	0.1		Gurenko et a 2015.
130-19-zrn20r	rim	1	5.13	0.1		Gurenko et a 2015.
